# Supplementary material for: A conversion of aromatic thiocyanates into sulfothioates: new synthetic route to aromatic Bunte salts
Source: Royal Society of Chemistry journal article supplement (doi:10.1039/c2ra21975a), 2012-12-18

## *Supplementary Information*

# **A Conversion of Aromatic Thiocyanates into Sulfothioates: New Synthetic Route to Aromatic Bunte Salts**

**Petr Jansa, Lucie Čechová, Martin Dračínský and Zlatko Janeba\***

*Institute of Organic Chemistry and Biochemistry, Academy of Sciences of the Czech Republic, v.v.i., Flemingovo nám. 2, CZ-16610 Prague 6, Czech Republic. Fax: +420 220183560; Tel: +420 220183143; E-mail: janeba@uochb.cas.cz*

### **Contents**

|                                                                 |       |
|-----------------------------------------------------------------|-------|
| Table of contents .....                                         | 1     |
| <sup>1</sup> H NMR and <sup>13</sup> C NMR spectra copies ..... | 2-13  |
| HR MS (ESI) spectra copies .....                                | 14-25 |
| UPLCs of conversion of <b>1c</b> to <b>2c</b> .....             | 26    |
| UPLCs of conversion of <b>1h</b> to <b>2h</b> .....             | 27    |

### $^1\text{H}$ NMR and $^{13}\text{C}$ NMR spectra of compounds 2a-2l.

Fig. S1. and S2.  $^1\text{H}$  NMR and  $^{13}\text{C}$  NMR spectra (DMSO- $d_6$ ) of sodium *S*-(2-methoxy-4-nitrophenyl) sulfthioate (**2a**).

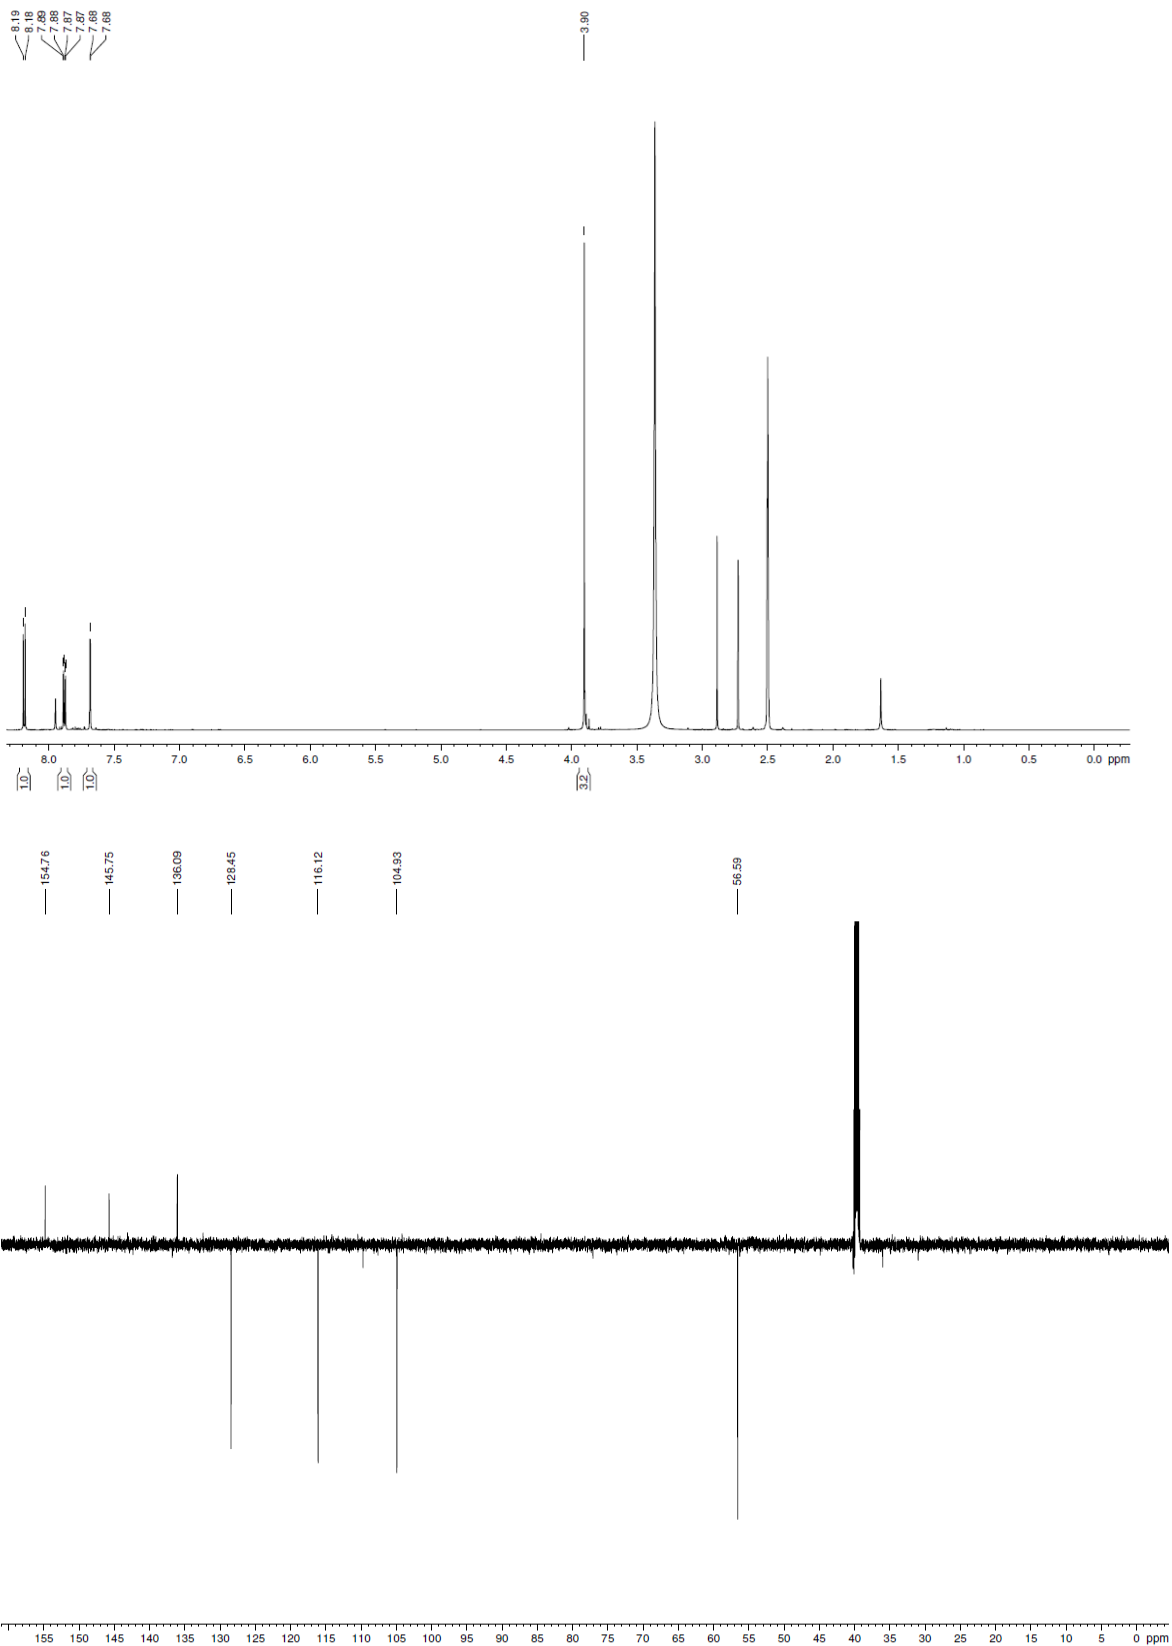

**Fig. S3. and S4.**  $^1\text{H}$  NMR and  $^{13}\text{C}$  NMR spectra (DMSO- $d_6$ ) of sodium *S*-(4-methyl-2-nitrophenyl) sulfothioate (**2b**).

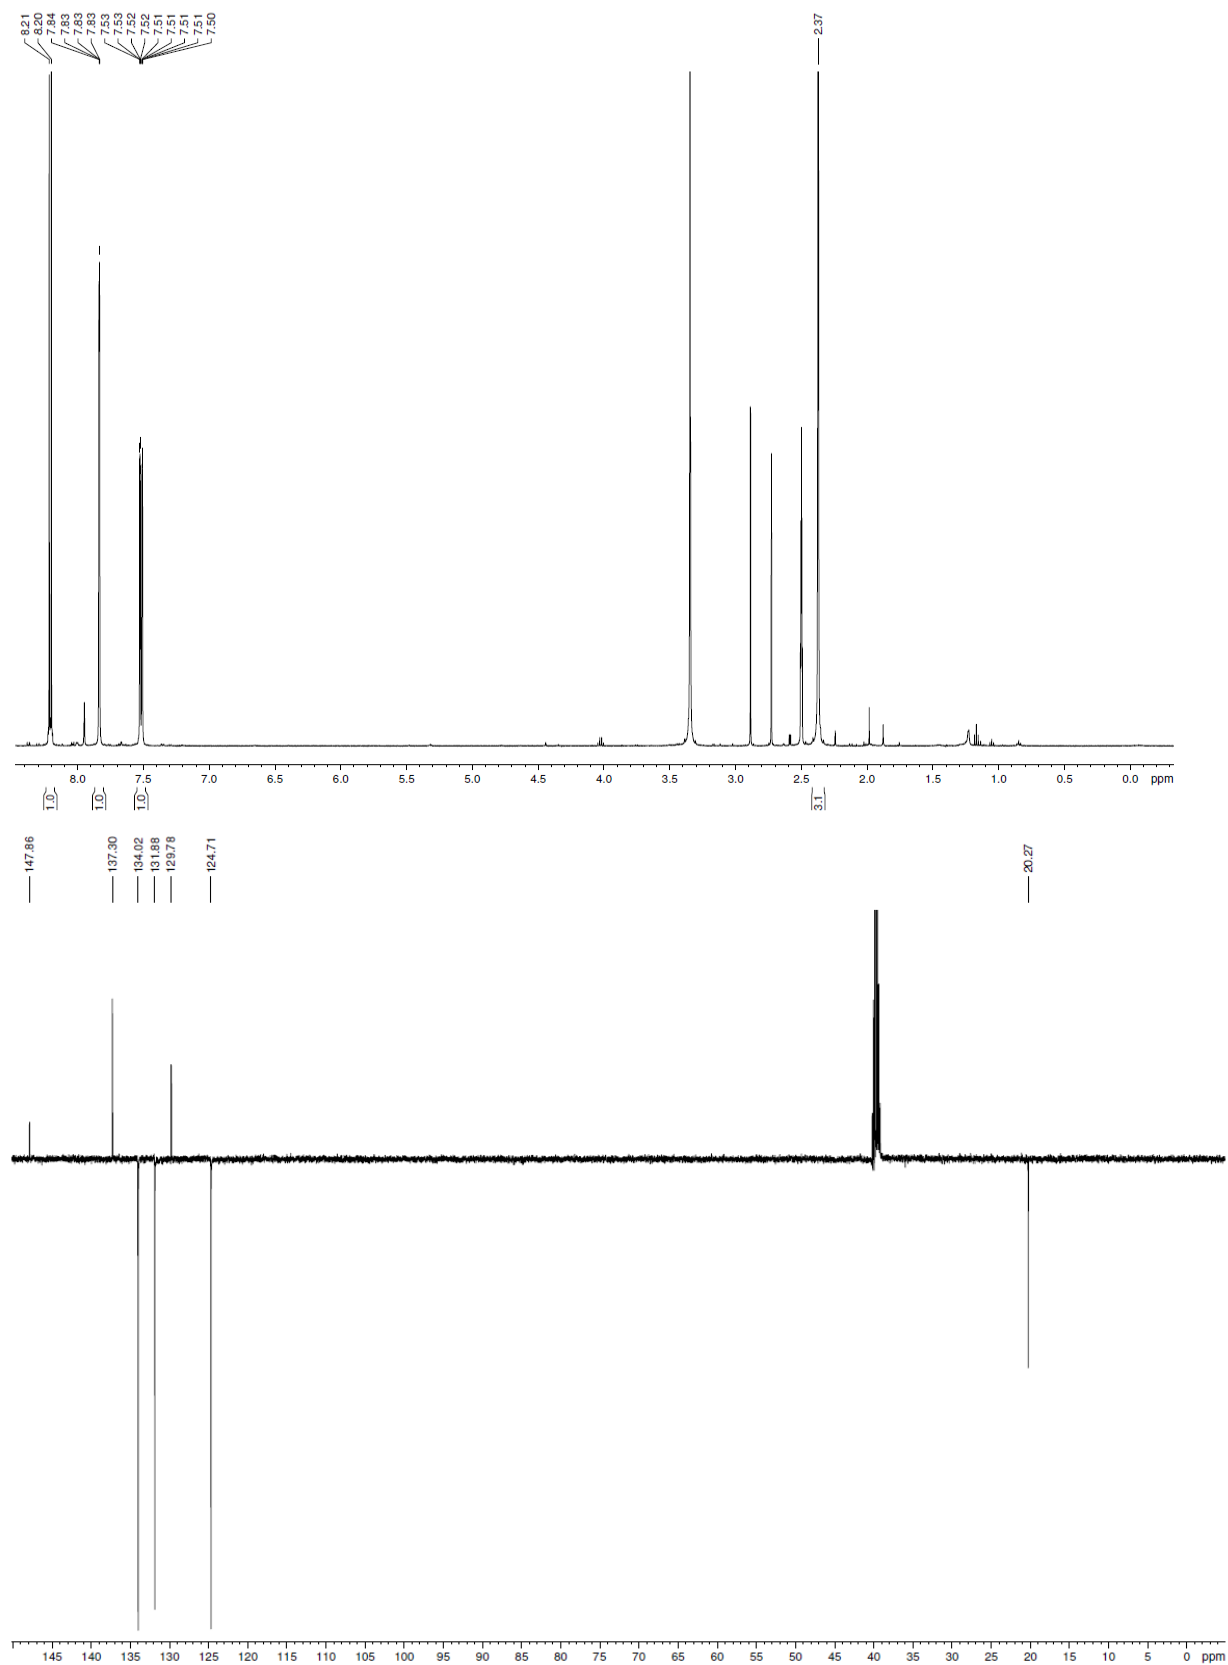

**Fig. S5. and S6.**  $^1\text{H}$  NMR and  $^{13}\text{C}$  NMR spectra ( $\text{D}_2\text{O}$ ) of sodium *S*-(4-amino-3-nitrophenyl) sulfothioate (**2c**).

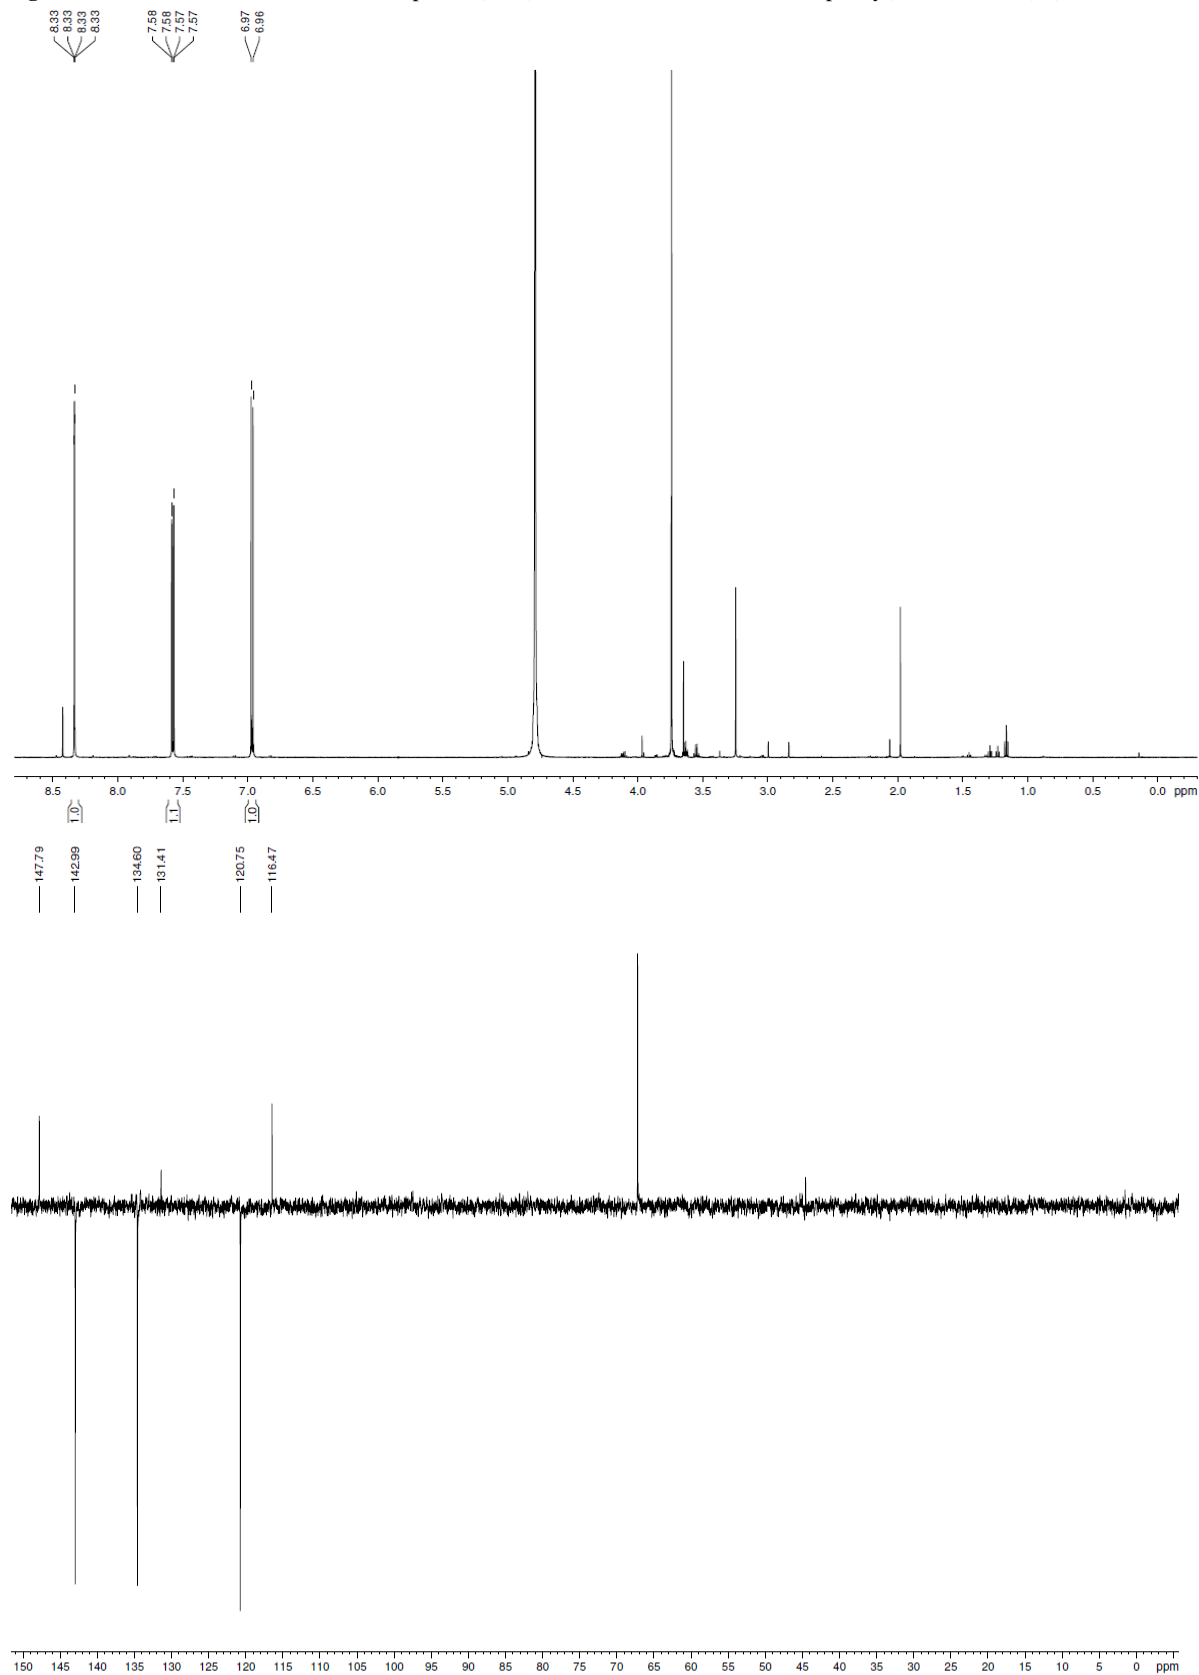

**Fig. S7. and S8.**  $^1\text{H}$  NMR and  $^{13}\text{C}$  NMR spectra (DMSO- $d_6$ ) of sodium *S*-(4-amino-3-methoxyphenyl) sulfothioate (**2d**).

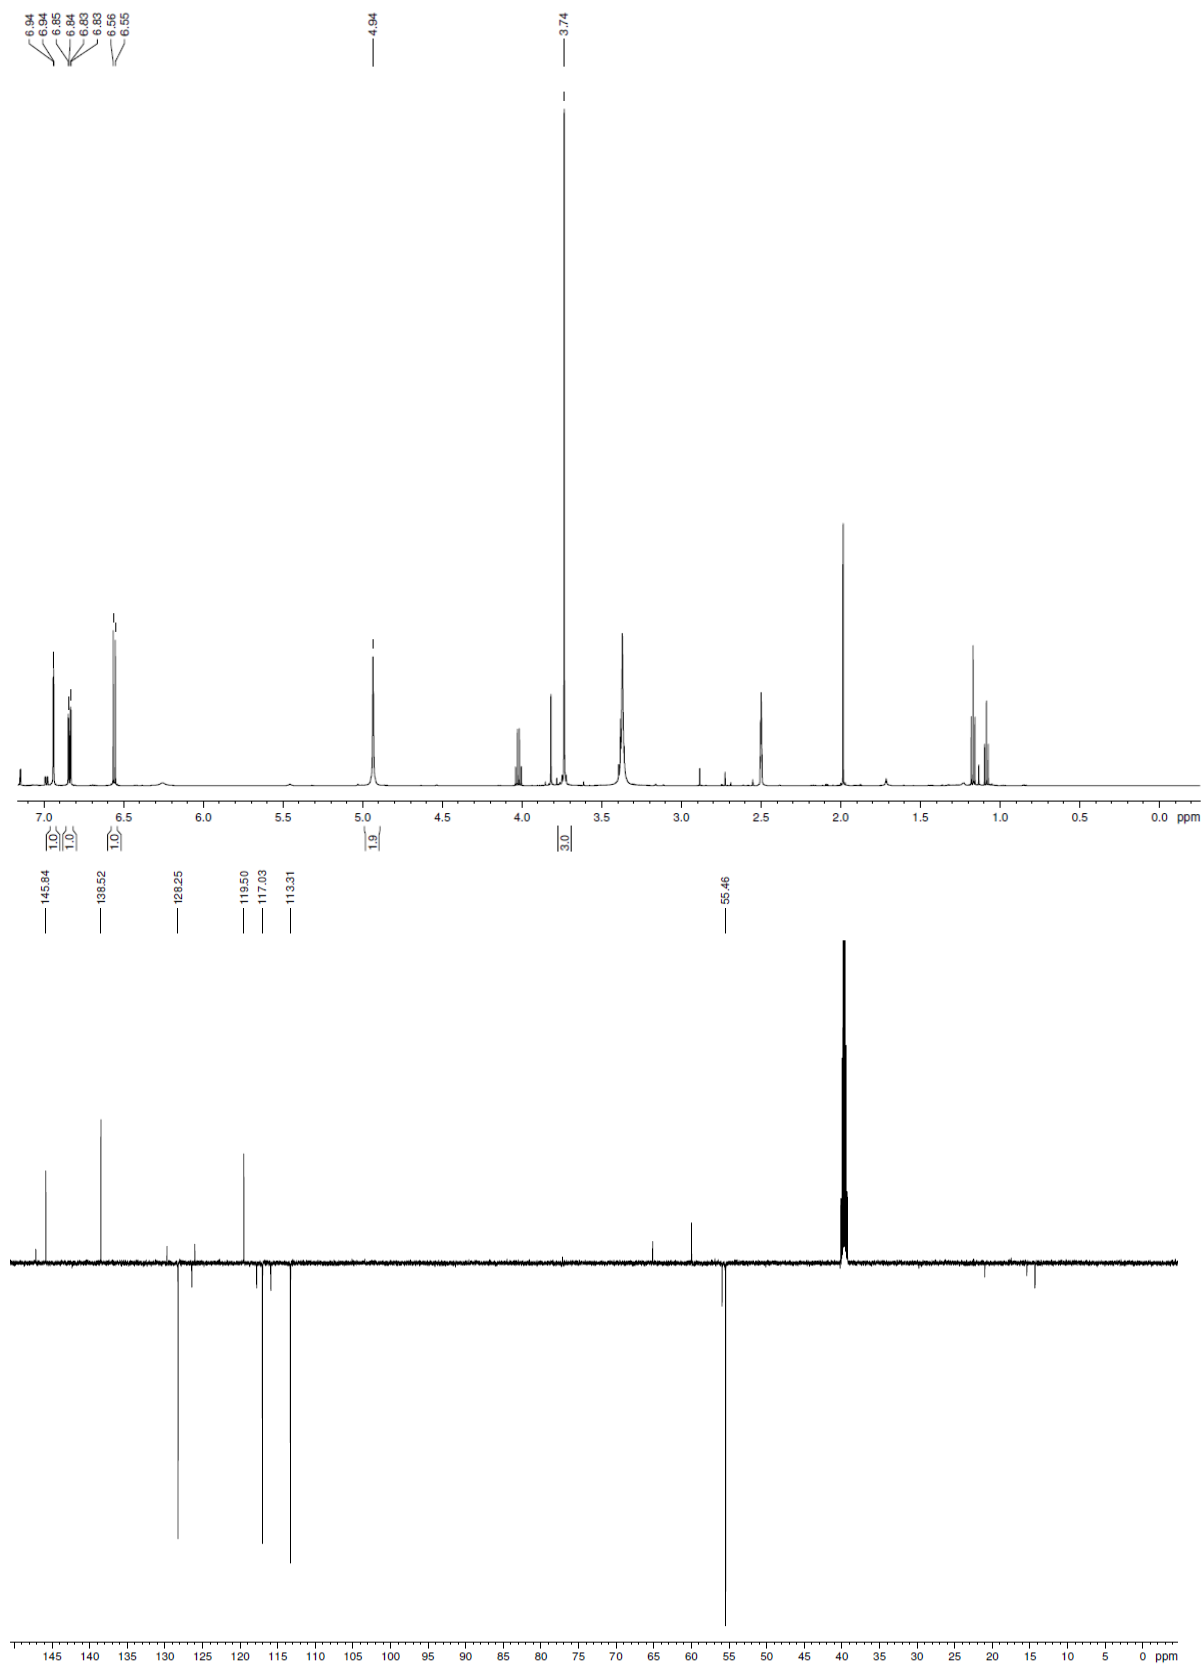

**Fig. S9. and S10.**  $^1\text{H}$  NMR and  $^{13}\text{C}$  NMR spectra (DMSO- $d_6$ ) of sodium *S*-(3,4-dimethoxyphenyl) sulfthioate (**2e**).

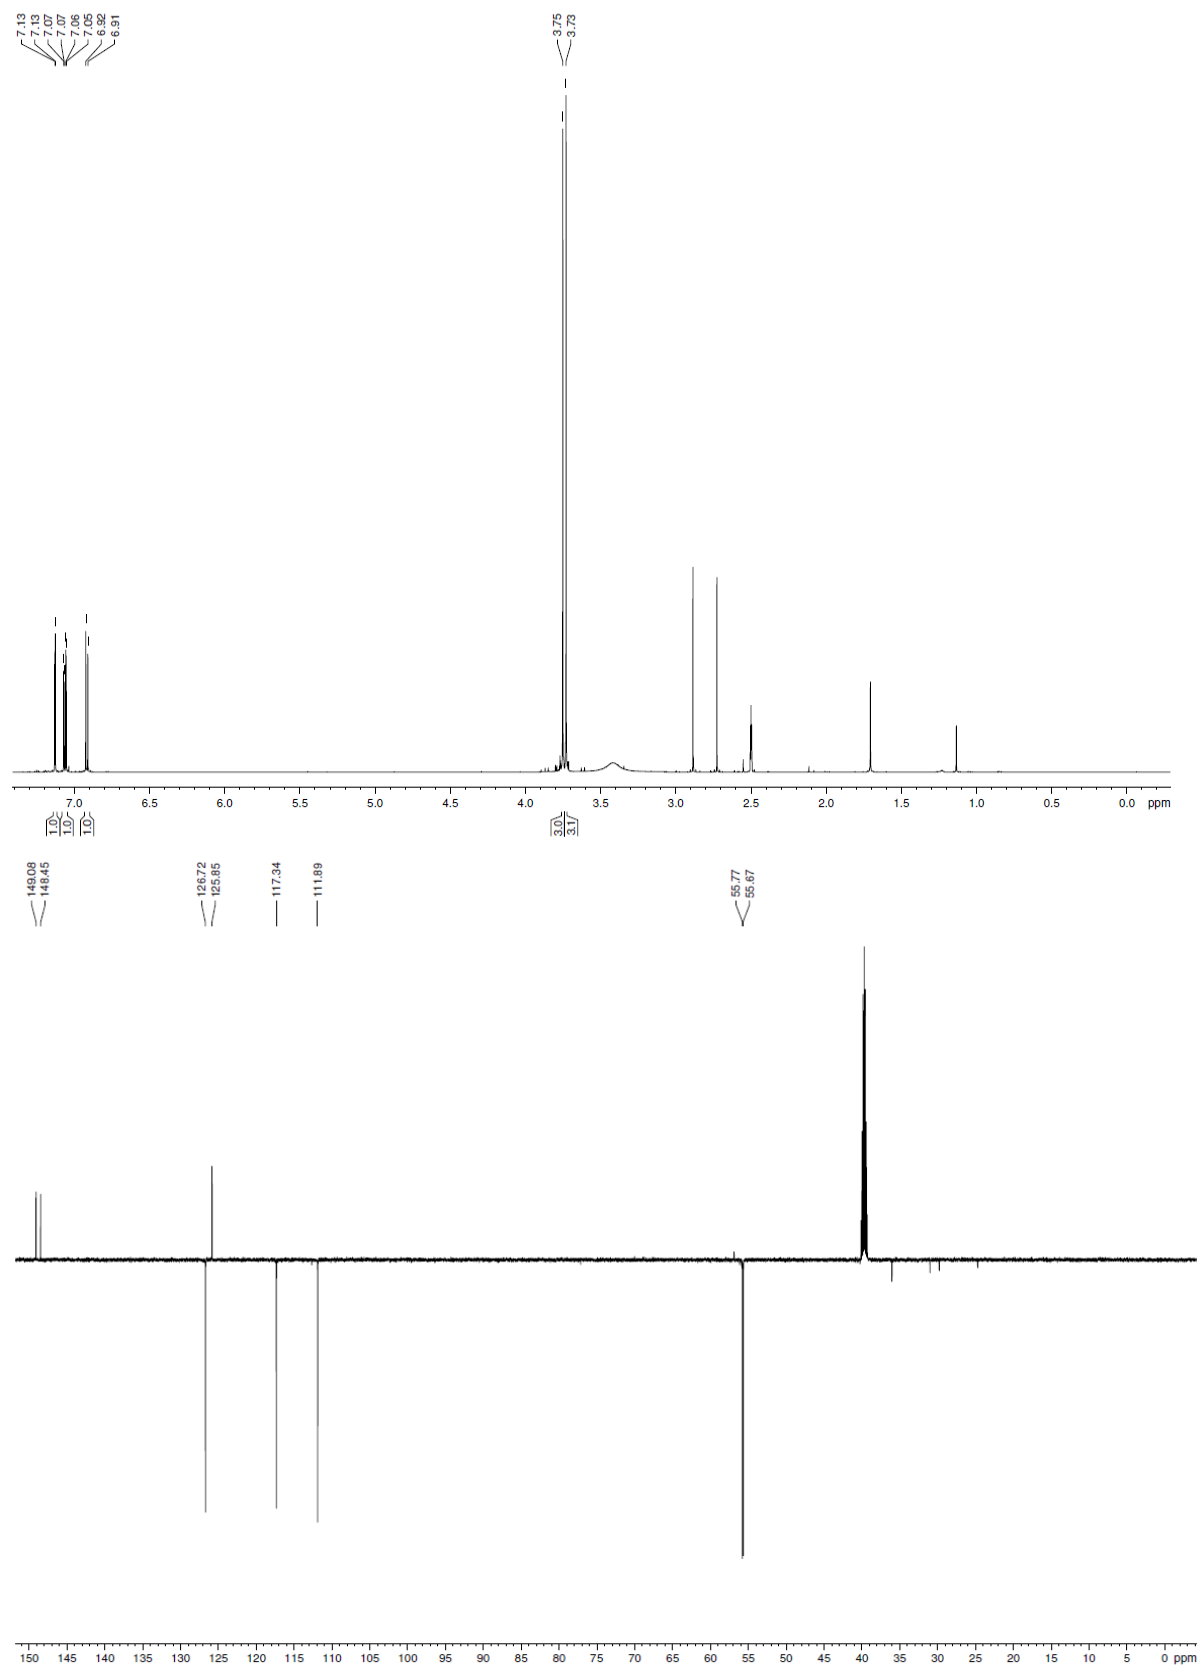

**Fig. S11. and S12.**  $^1\text{H}$  and  $^{13}\text{C}$  NMR spectra (DMSO- $d_6$ ) of sodium *S*-(4-acetamido-3-methoxyphenyl) sulfothioate (**2f**).

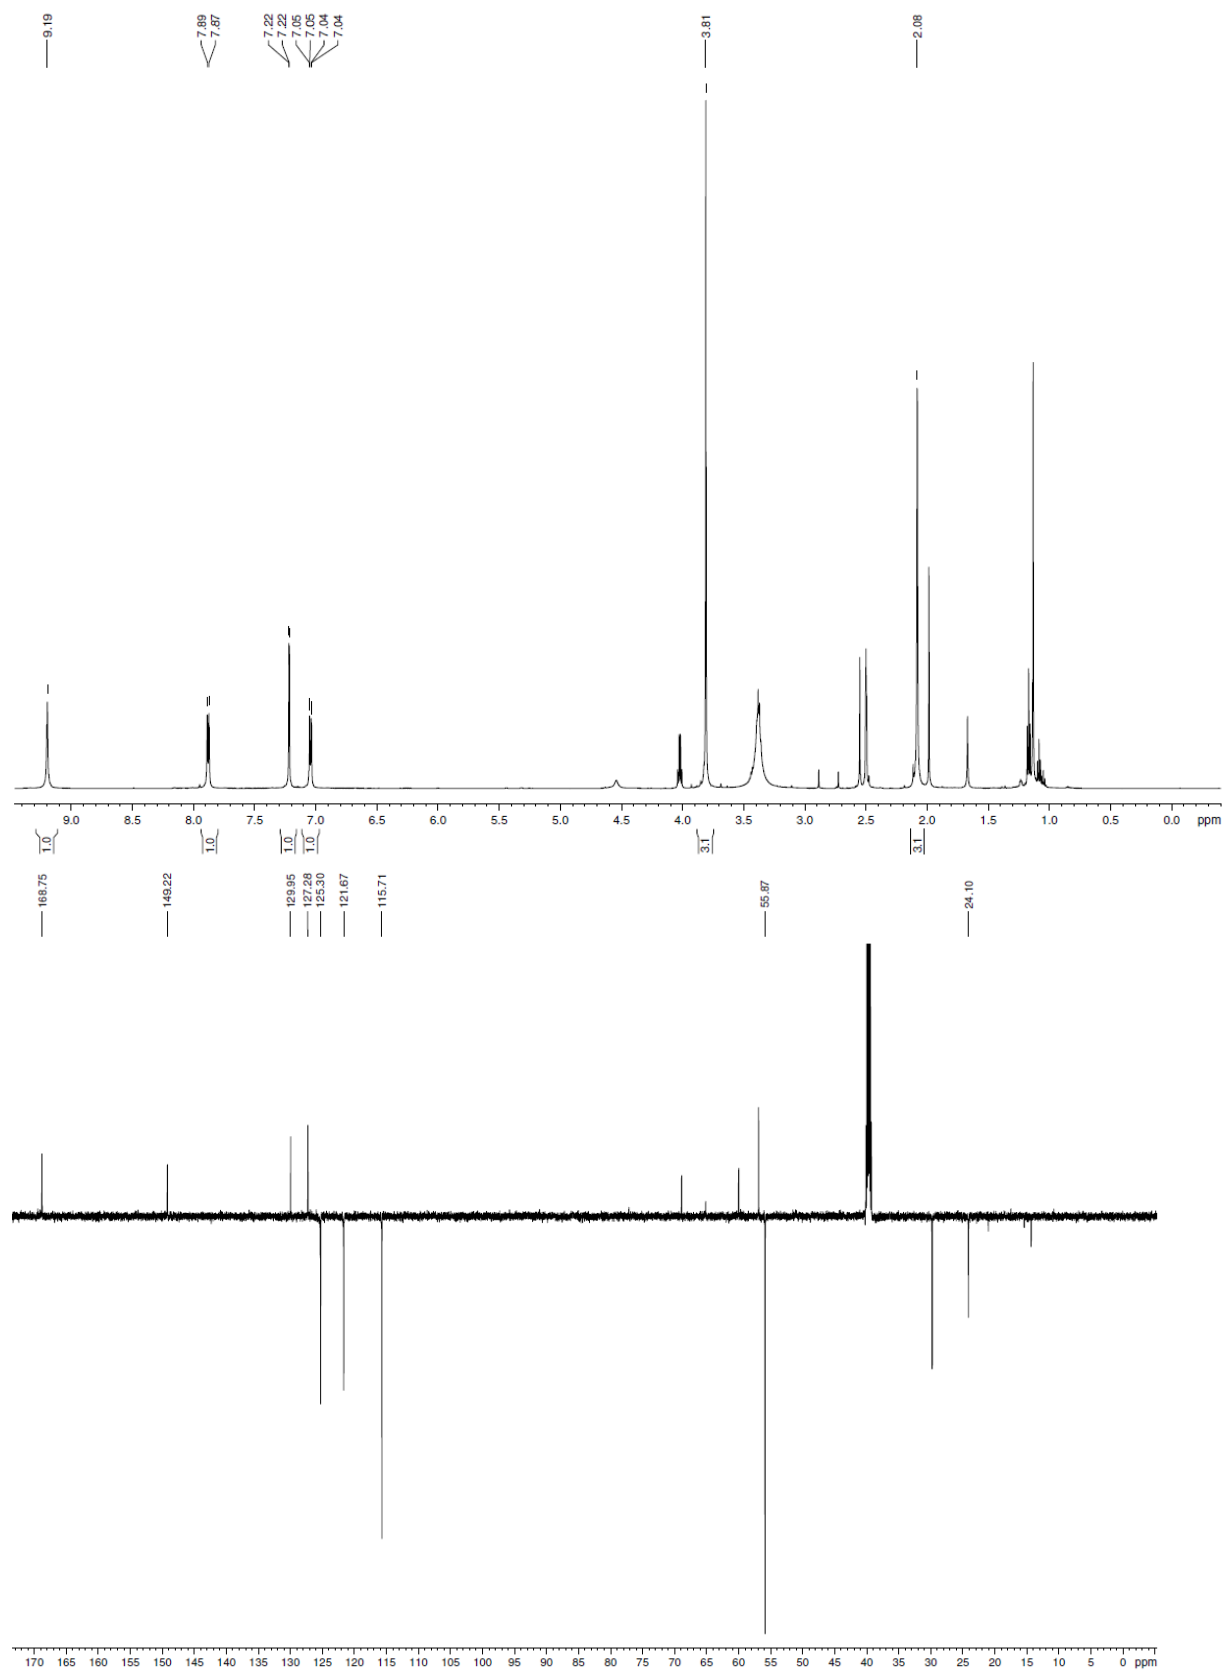

**Fig. S13. and S14.**  $^1\text{H}$  and  $^{13}\text{C}$  NMR spectra (DMSO- $d_6$ ) of sodium *S*-(3-carboxy-4-nitrophenyl) sulfothioate (**2g**).

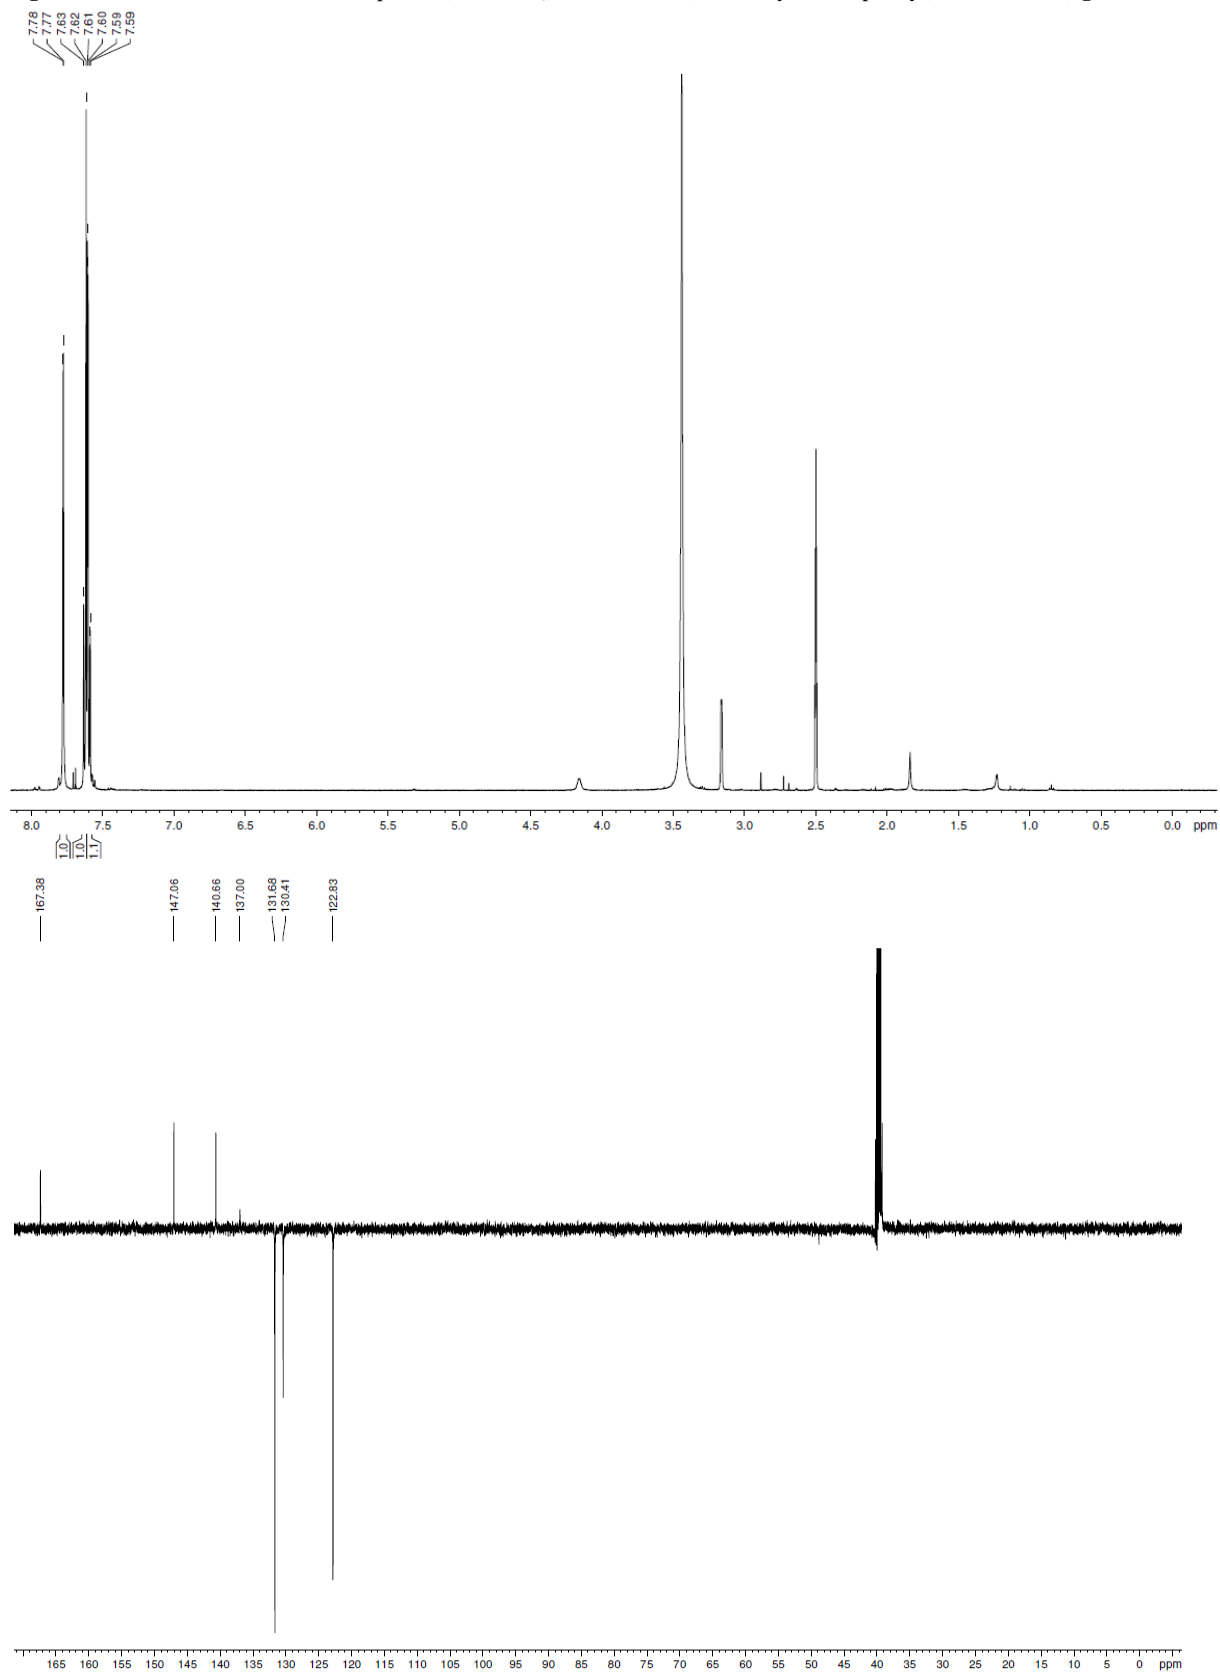





**Fig. S17. and S18.**  $^1\text{H}$  and  $^{13}\text{C}$  NMR spectra (DMSO- $d_6$ ) of sodium *S*-(2,4-diamino-6-chloropyrimidin-5-yl) sulfathioate (**2i**).

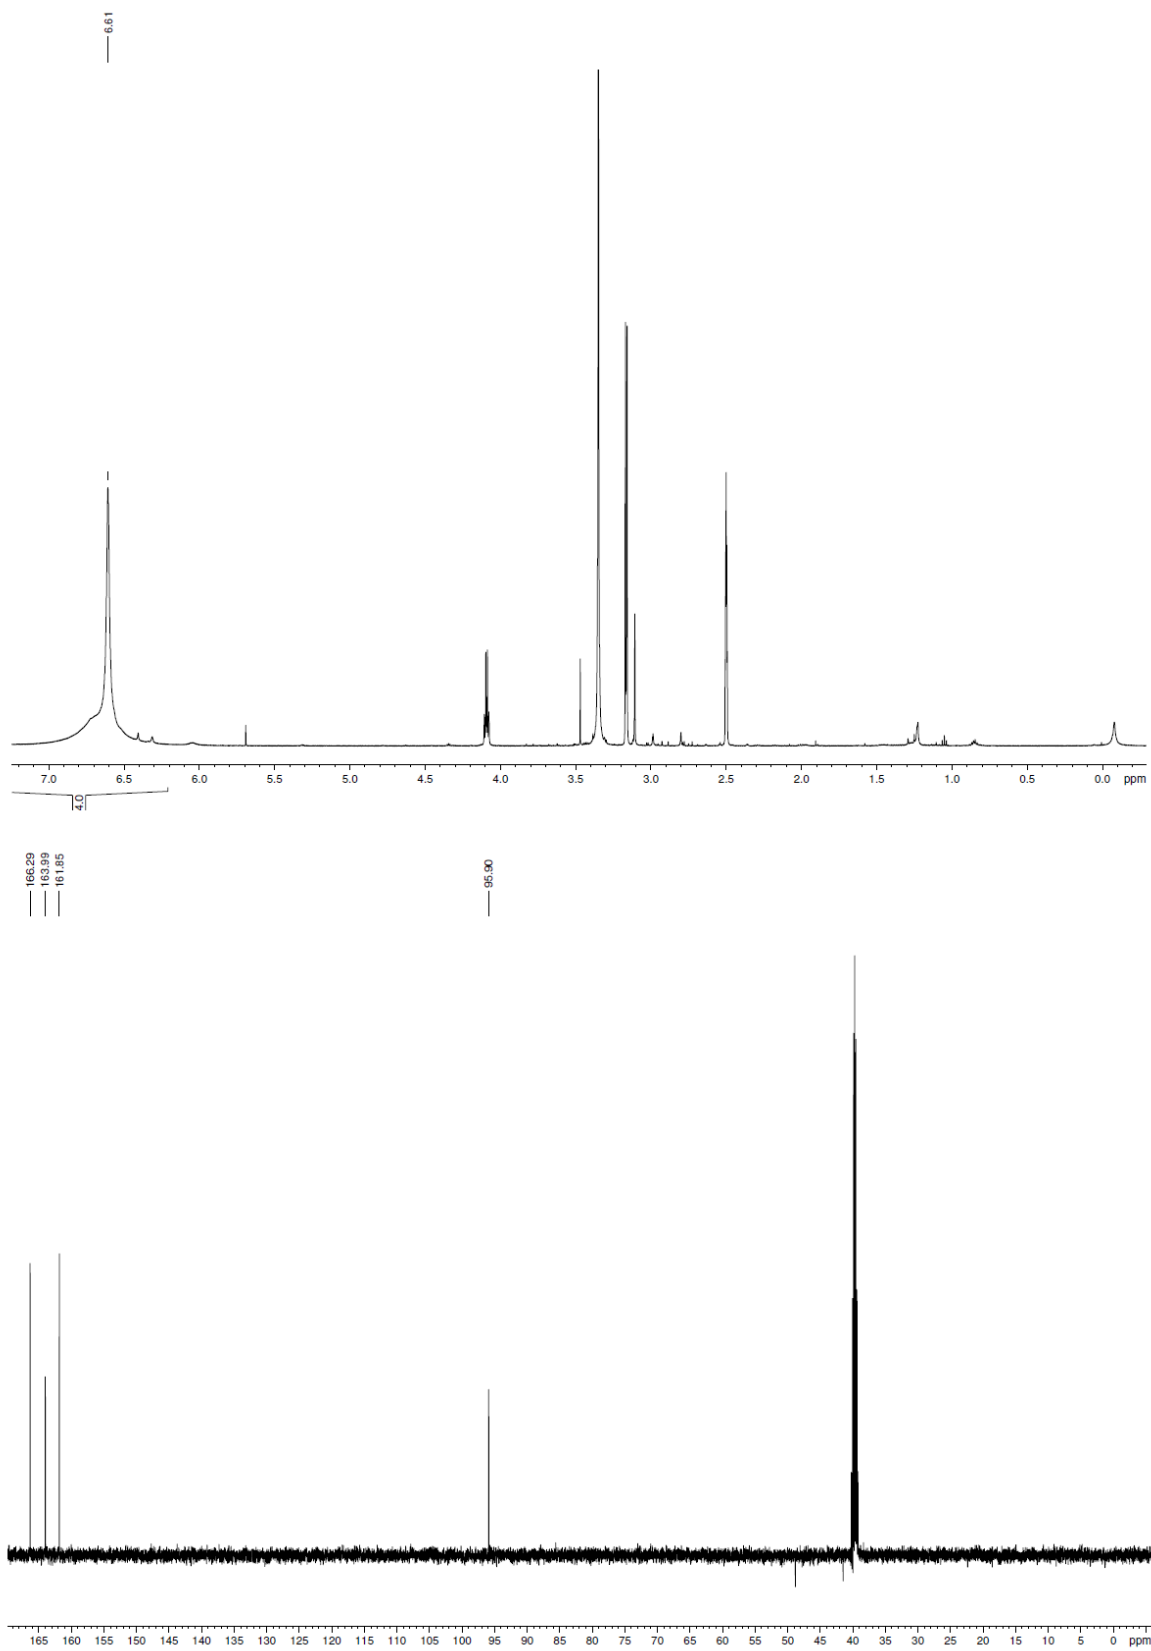

**Fig. S19. and S20.**  $^1\text{H}$  and  $^{13}\text{C}$  NMR spectra (DMSO- $d_6$ ) of sodium *S*-(2-amino-4,6-dimethoxypyrimidin-5-yl) sulfathioate (**2j**).

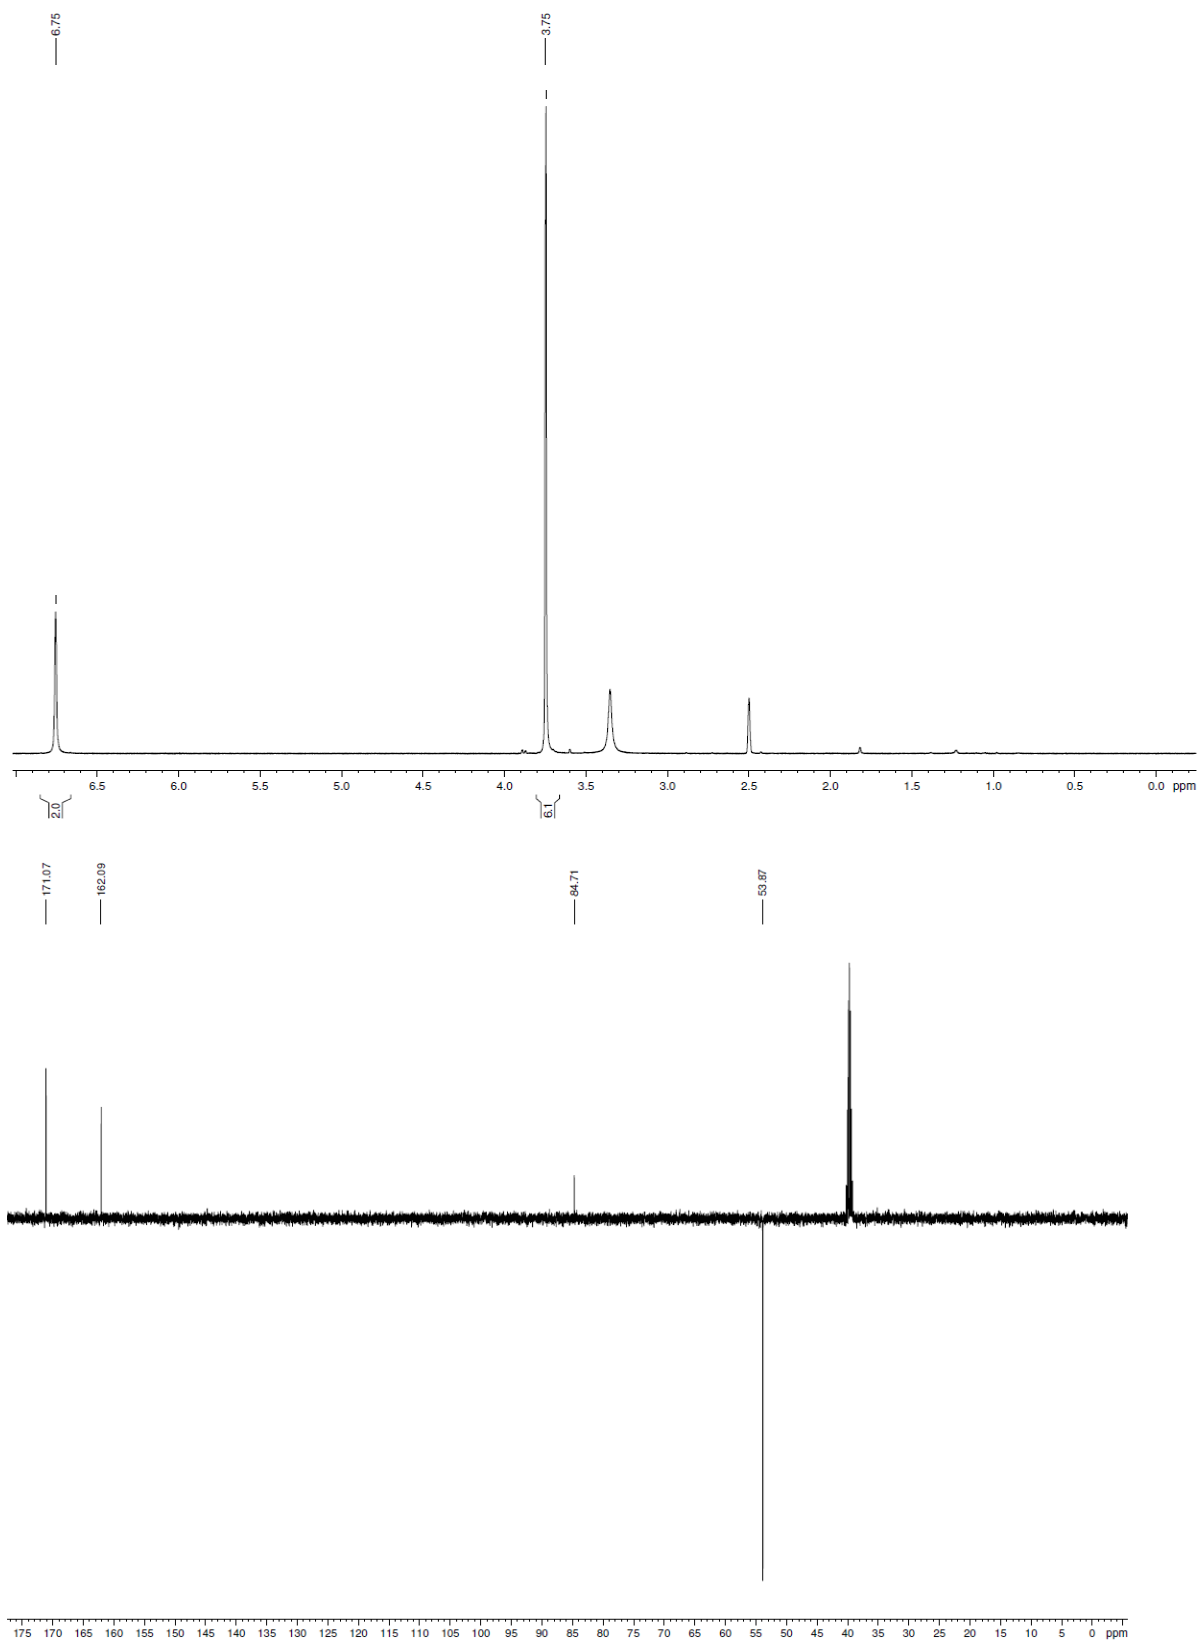

**Fig. S21. and S22.**  $^1\text{H}$  and  $^{13}\text{C}$  NMR spectra (DMSO- $d_6$ ) of sodium *S*-(2,4-diamino-6-hydroxypyrimidin-5-yl) sulfthioate (**2k**).

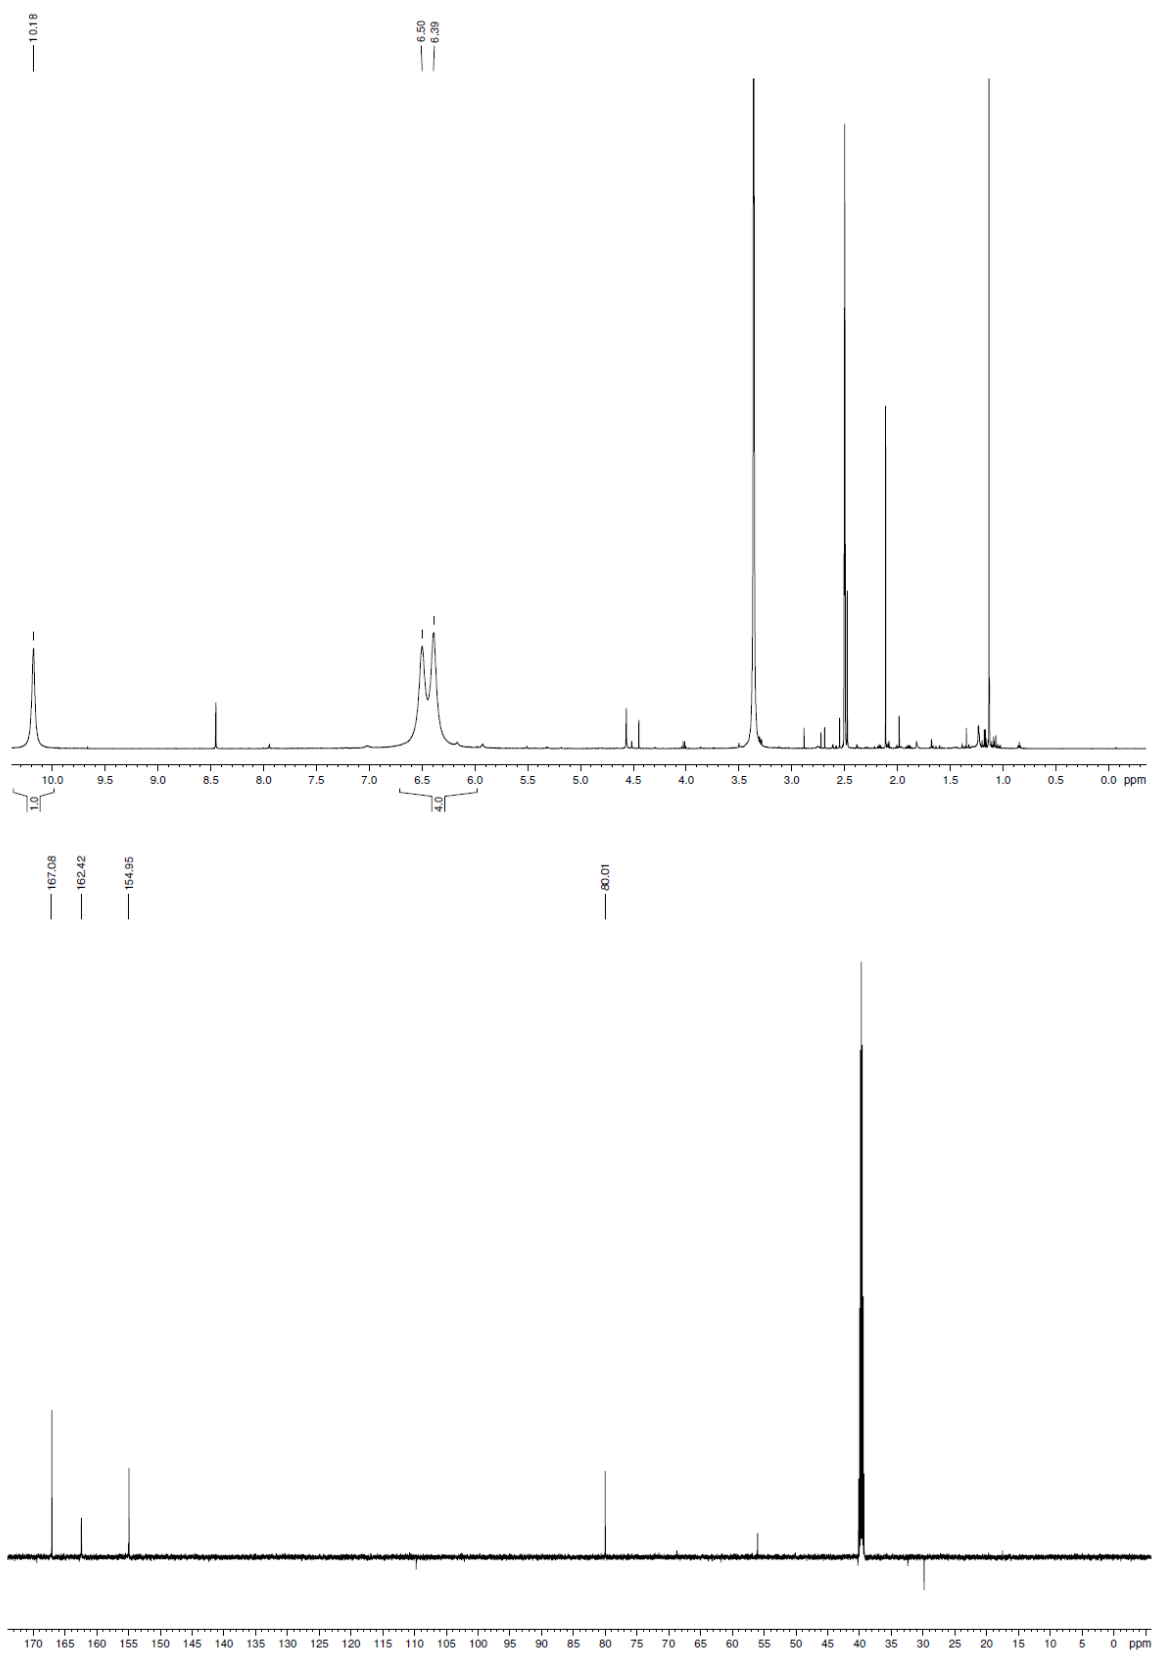

**Fig. S23. and S24.**  $^1\text{H}$  and  $^{13}\text{C}$  NMR spectra (DMSO- $d_6$ ) of sodium *S*-(4,6-dimethylpyrimidin-2-yl) sulfathioate (**21**).

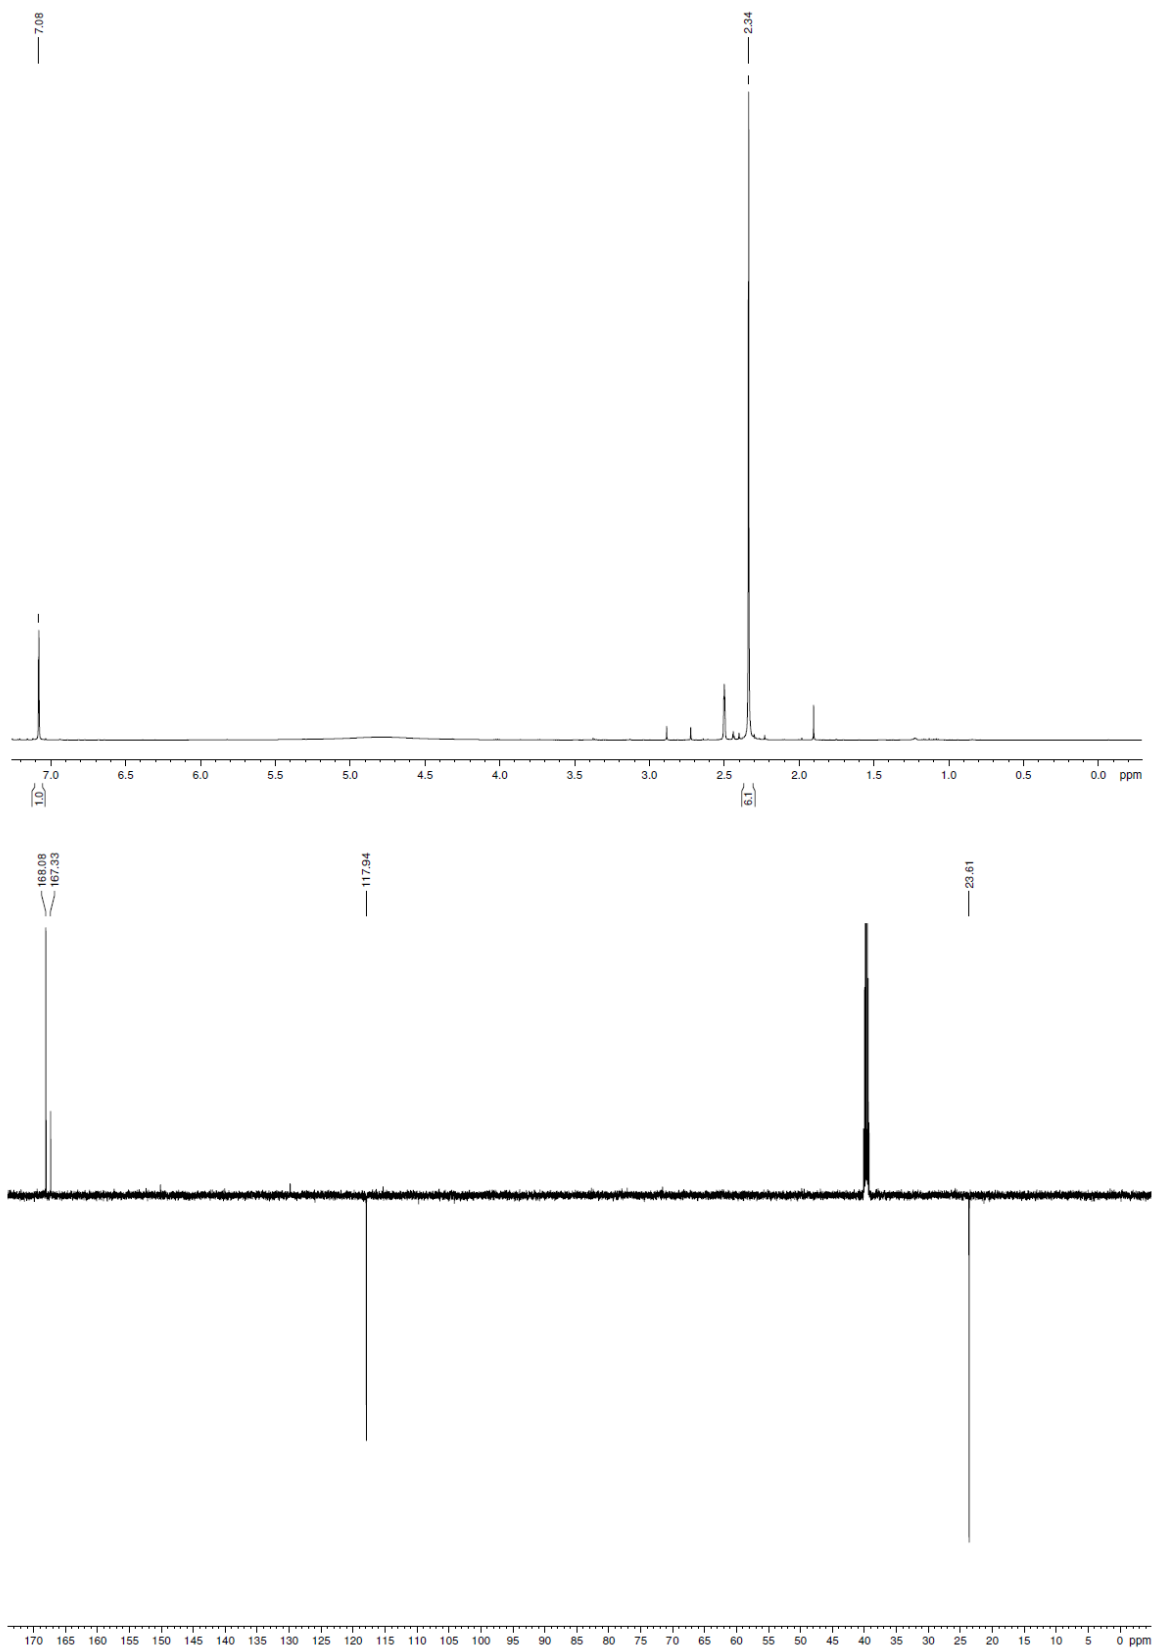

**Fig. S25.** HR MS spectrum (ESI) of sodium *S*-(2-methoxy-4-nitrophenyl) sulfathioate (**2a**).

280411servis\_07-

4/28/2011 5:52:35 PM

Jansa, LC95

280411servis\_07-#63-67 RT: 1.81-1.92 AV: 5 NL: 2.20E6  
T: FTMS - p ESI Full ms [200.00-2000.00]

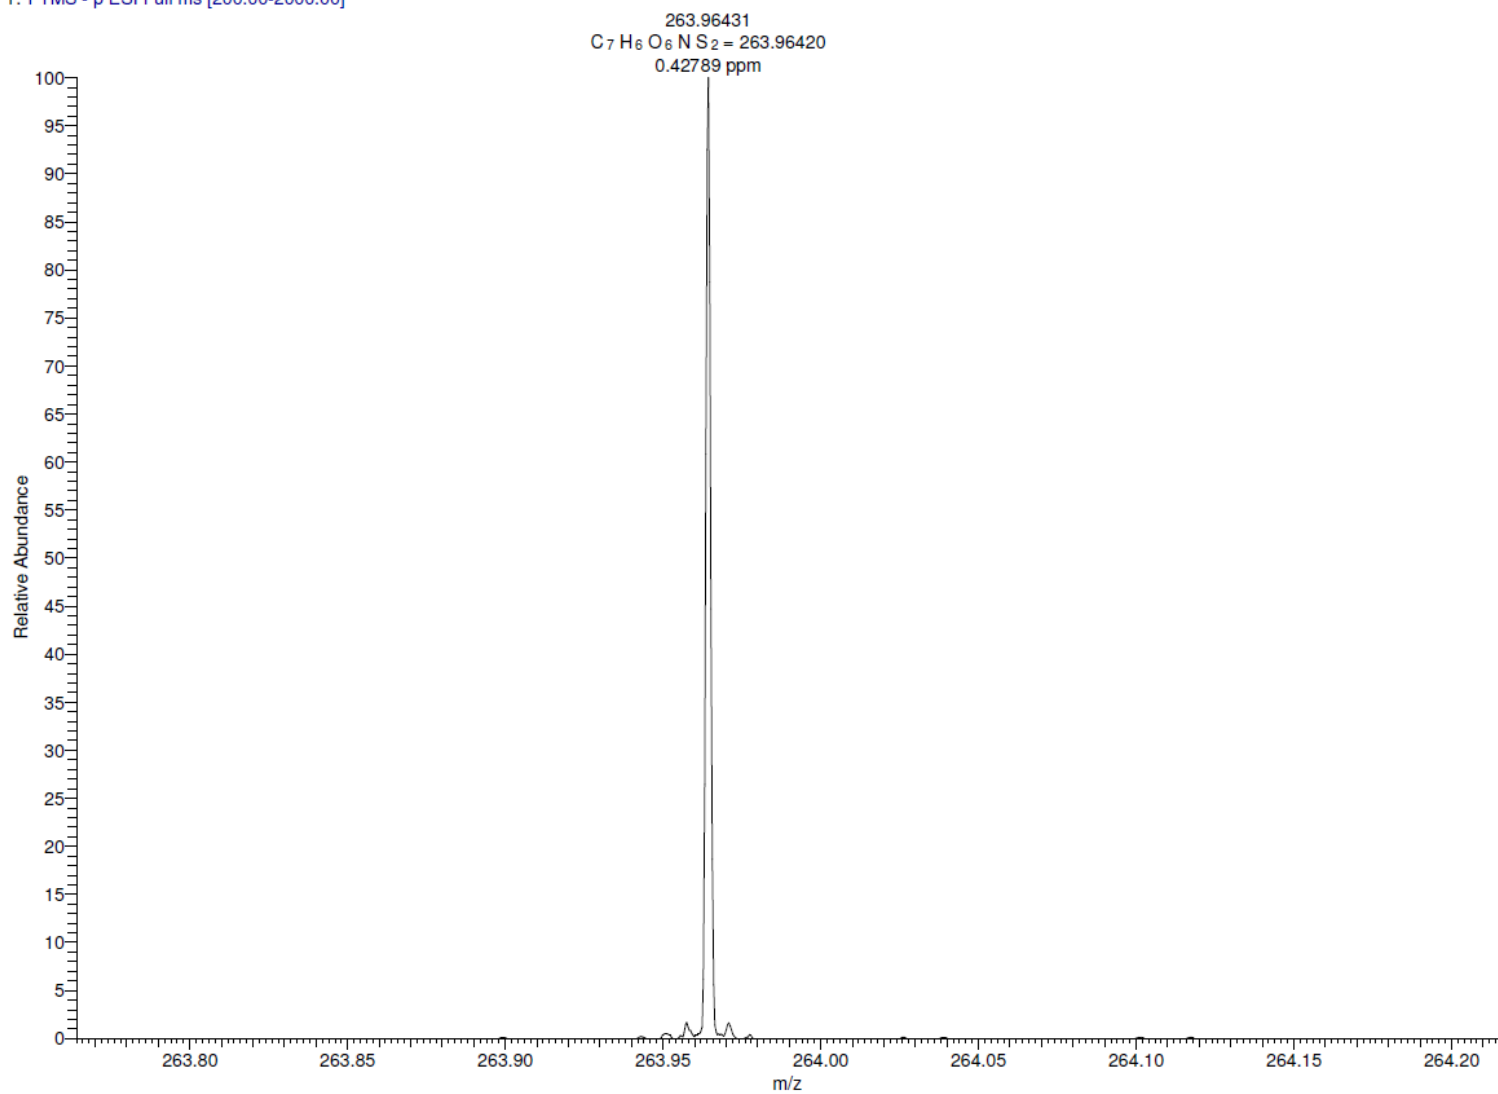

**Fig. S26.** HR MS spectrum (ESI) of sodium *S*-(4-methyl-2-nitrophenyl) sulfothioate (**2b**).

230311servis\_07-

3/23/2011 7:10:40 PM

Jansa, LC83-B

230311servis\_07- #59-62 RT: 1.71-1.80 AV: 4 NL: 6.07E6  
T: FTMS - p ESI Full ms [50.00-600.00]

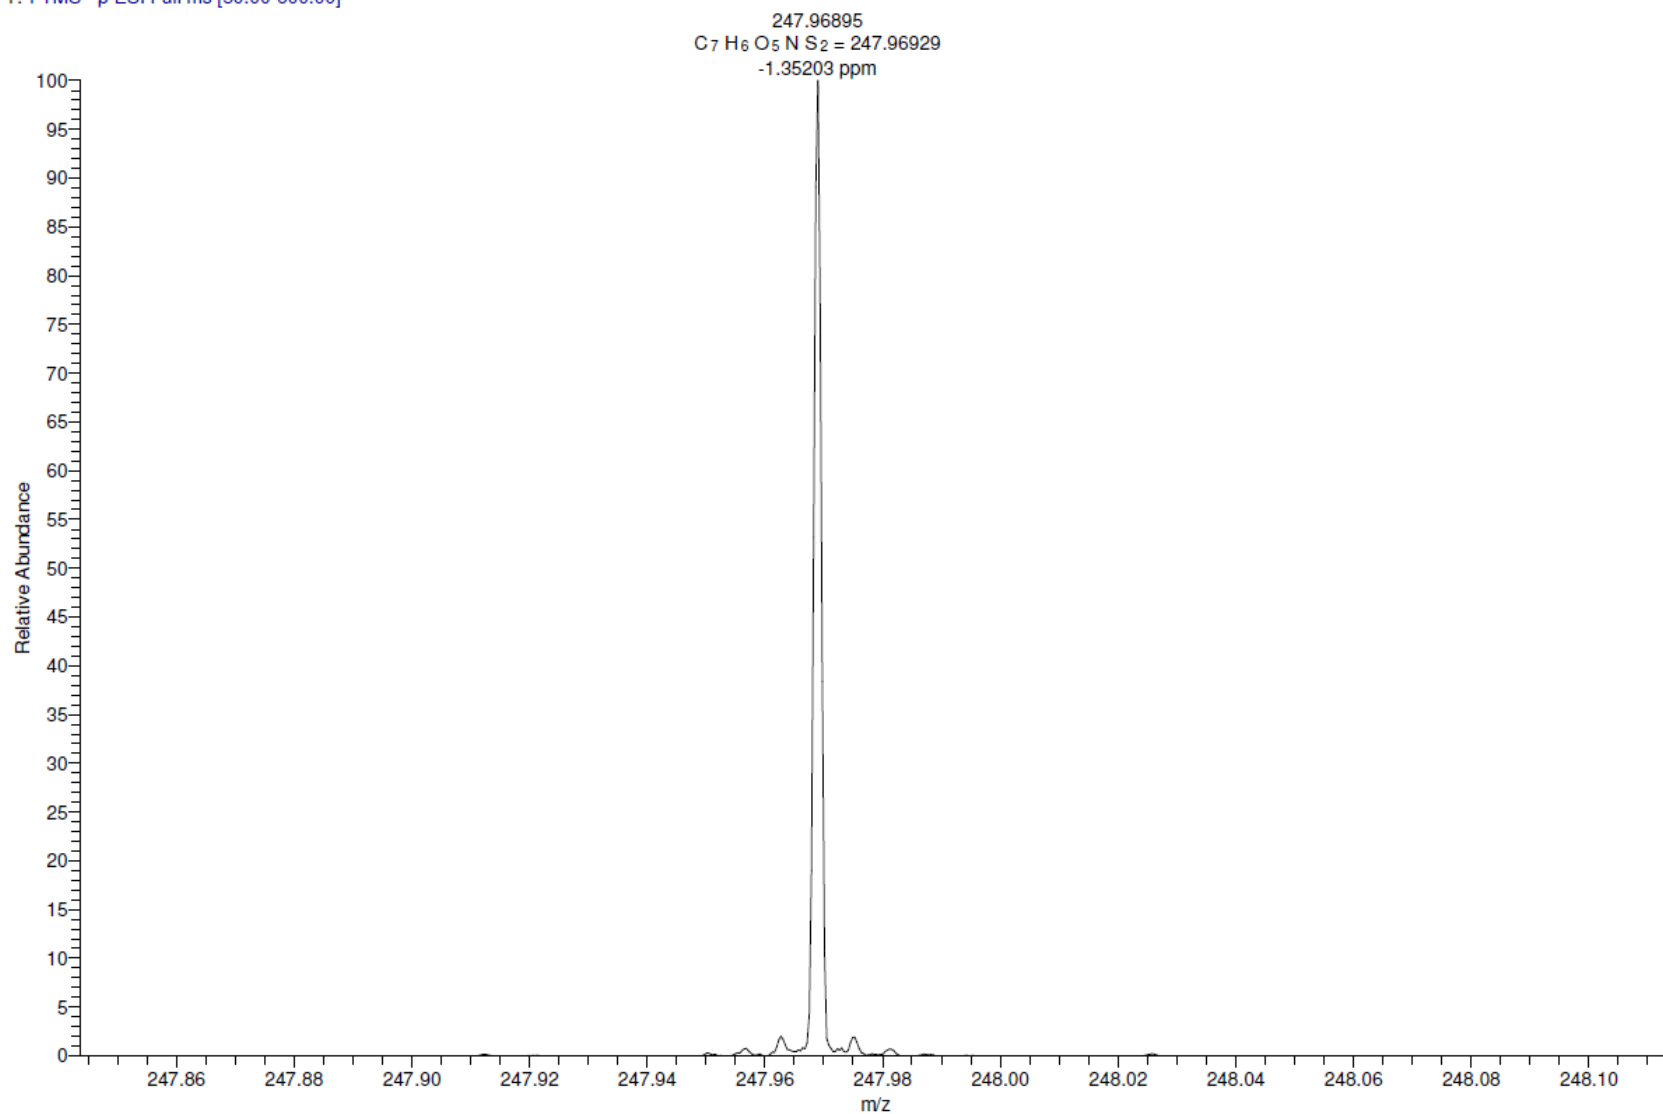

**Fig. S27.** HR MS spectrum (ESI) of sodium *S*-(4-amino-3-nitrophenyl) sulfothioate (**2c**).

210510servis\_13--

5/21/2010 10:56:35 AM

Jansa, PJ 626

210510servis\_13-- #59-64 RT: 1.69-1.84 AV: 6 NL: 5.37E6  
T: FTMS - p ESI Full ms [200.00-2000.00]

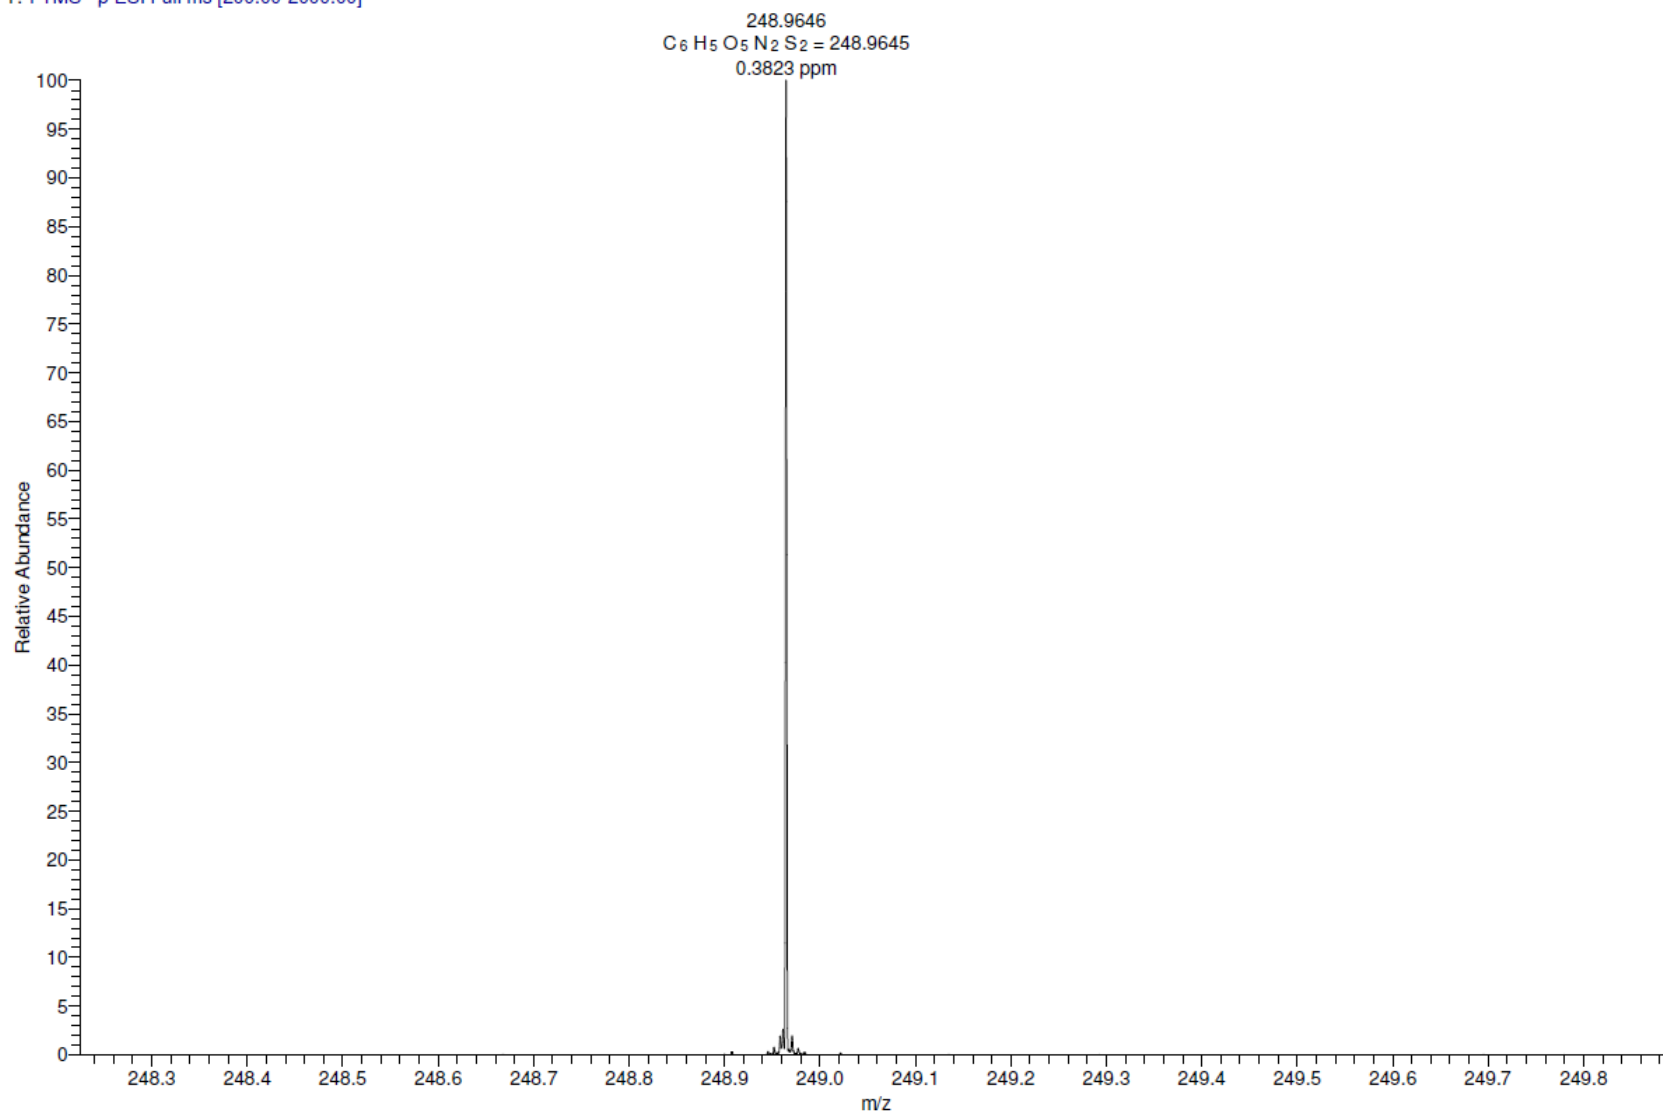



**Fig. S28.** HR MS spectrum (ESI) of sodium *S*-(4-amino-3-methoxyphenyl) sulfothioate (**2d**).

280411servis\_10-

4/28/2011 6:04:49 PM

Jansa, LC93

280411servis 10- #61-64 RT: 1.75-1.83 AV: 4 NL: 3.94E6  
T: FTMS - p ESI Full ms [200.00-2000.00]

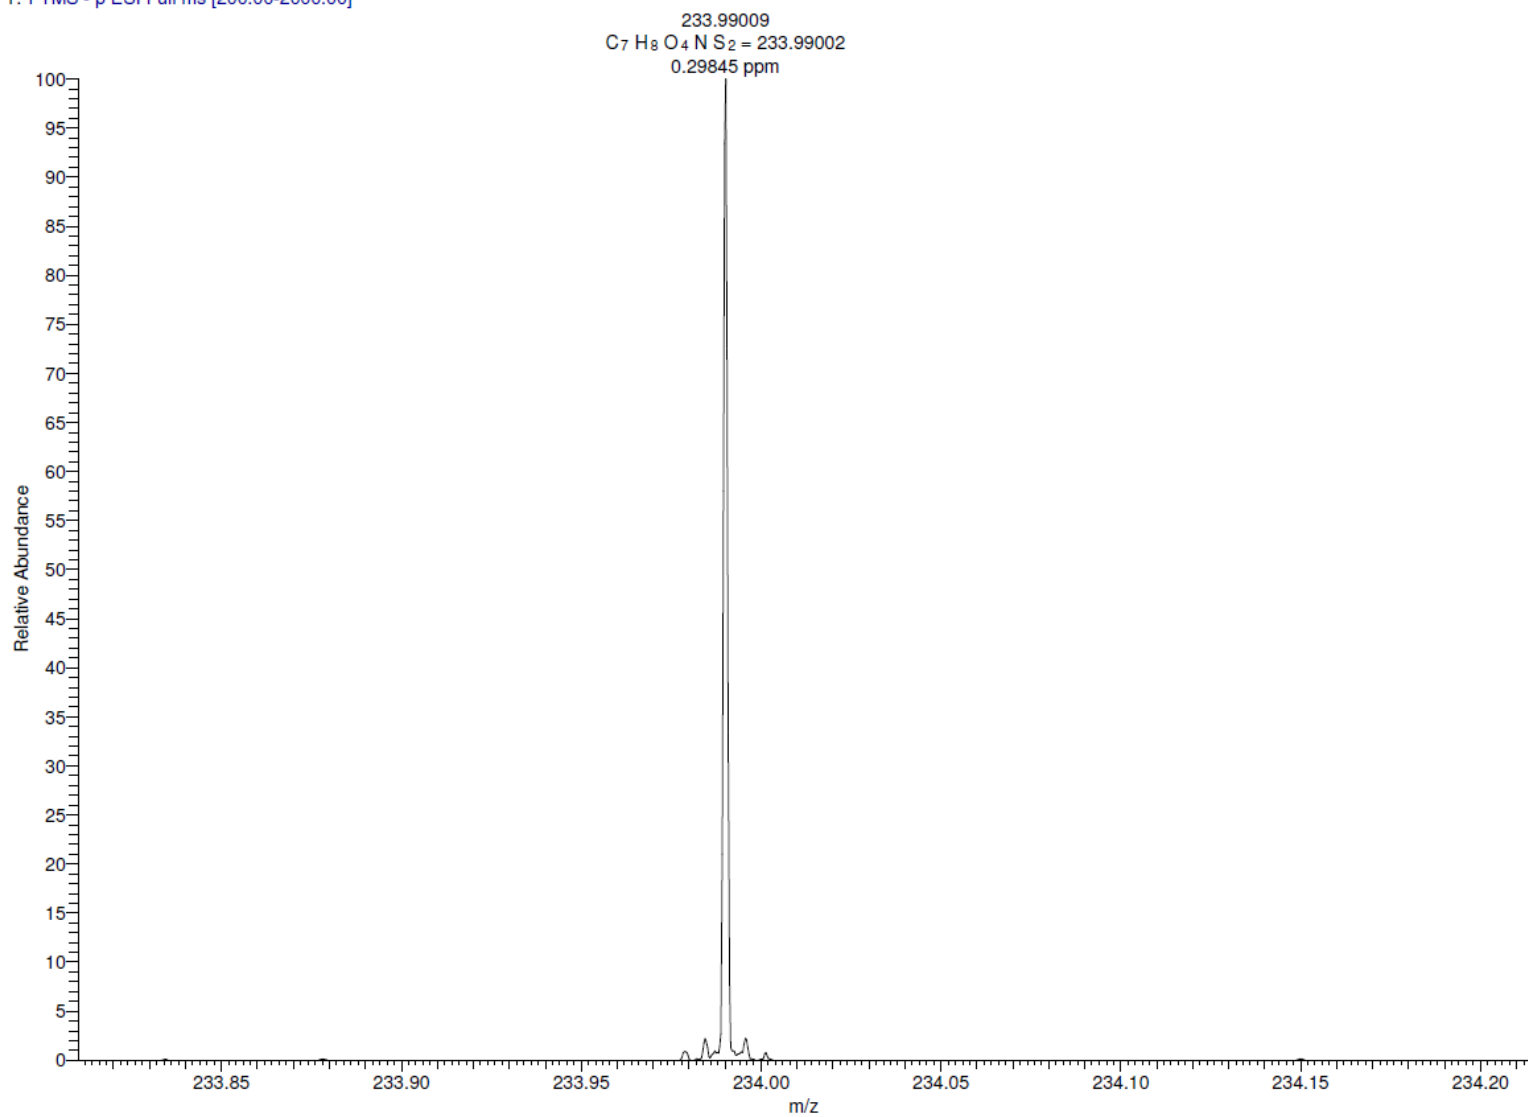

**Fig. S29.** HR MS spectrum (ESI) of sodium *S*-(3,4-dimethoxyphenyl) sulfathioate (**2e**).

280411servis\_09-

4/28/2011 6:00:45 PM

Jansa, LC94

280411servis\_09- #60-63 RT: 1.72-1.81 AV: 4 NL: 6.04E6  
T: FTMS - p ESI Full ms [200.00-2000.00]

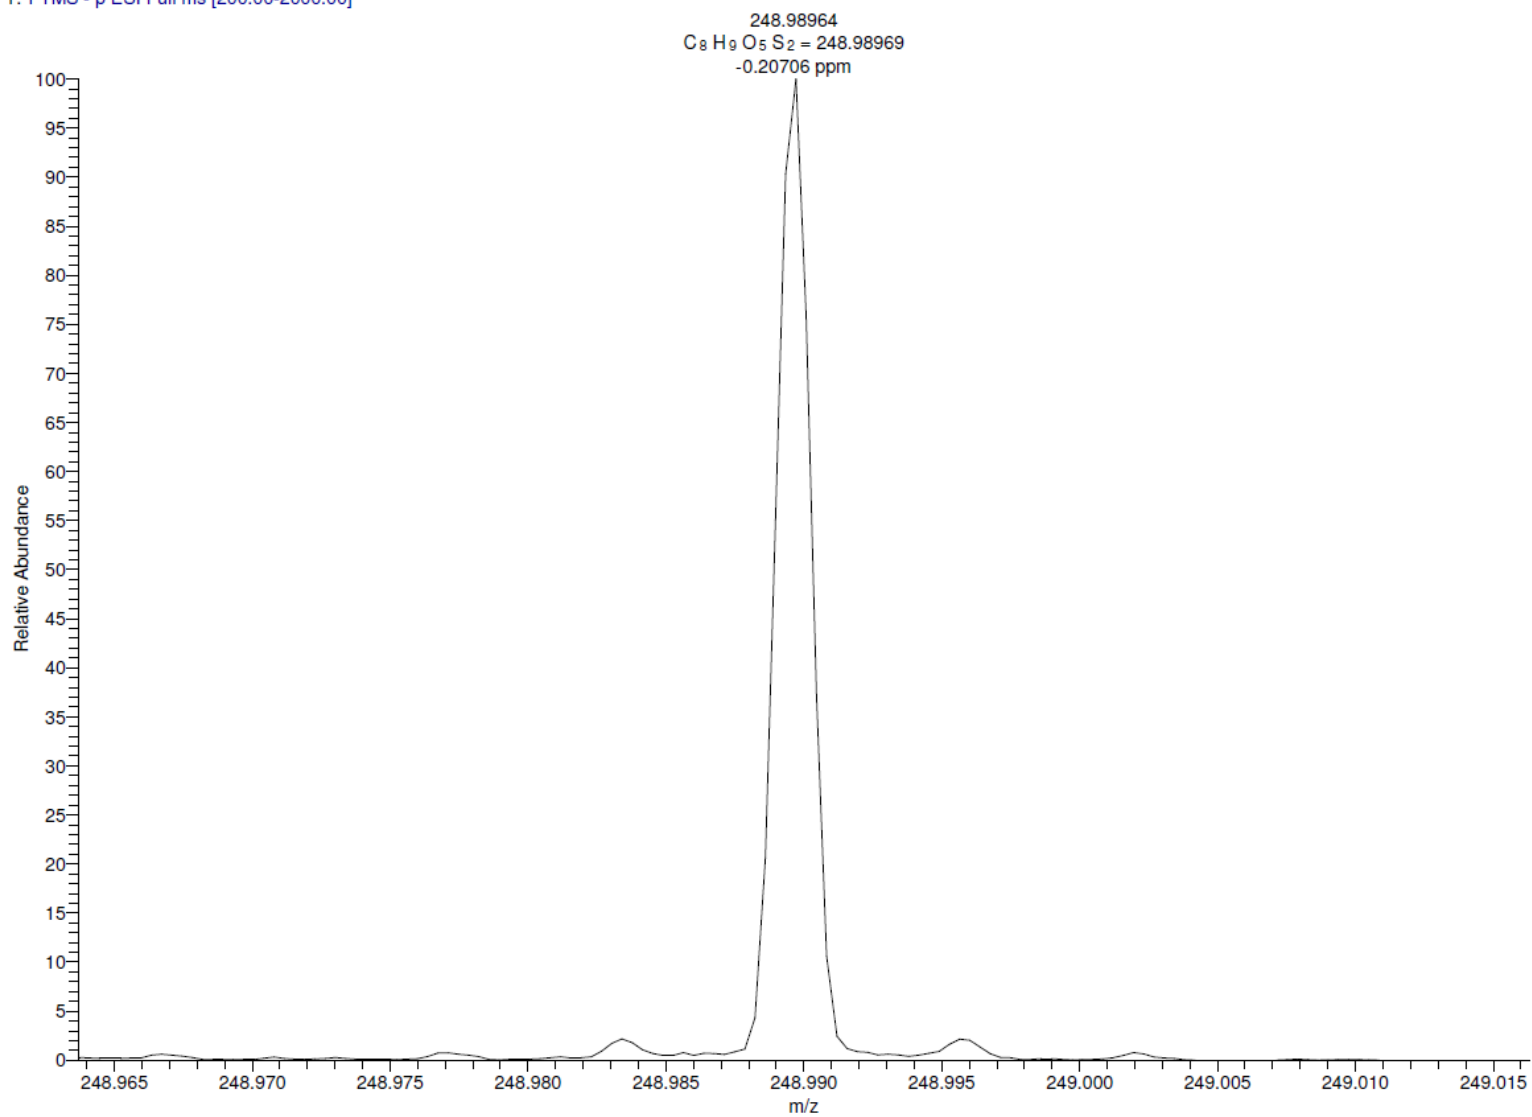

**Fig. S30.** HR MS spectrum (ESI) of sodium *S*-(4-acetamido-3-methoxyphenyl) sulfothioate (**2f**).

280411servis\_08-

4/28/2011 5:56:40 PM

Jansa, LC96

280411servis\_08- #61-63 RT: 1.75-1.81 AV: 3 NL: 9.58E6  
T: FTMS - p ESI Full ms [200.00-2000.00]

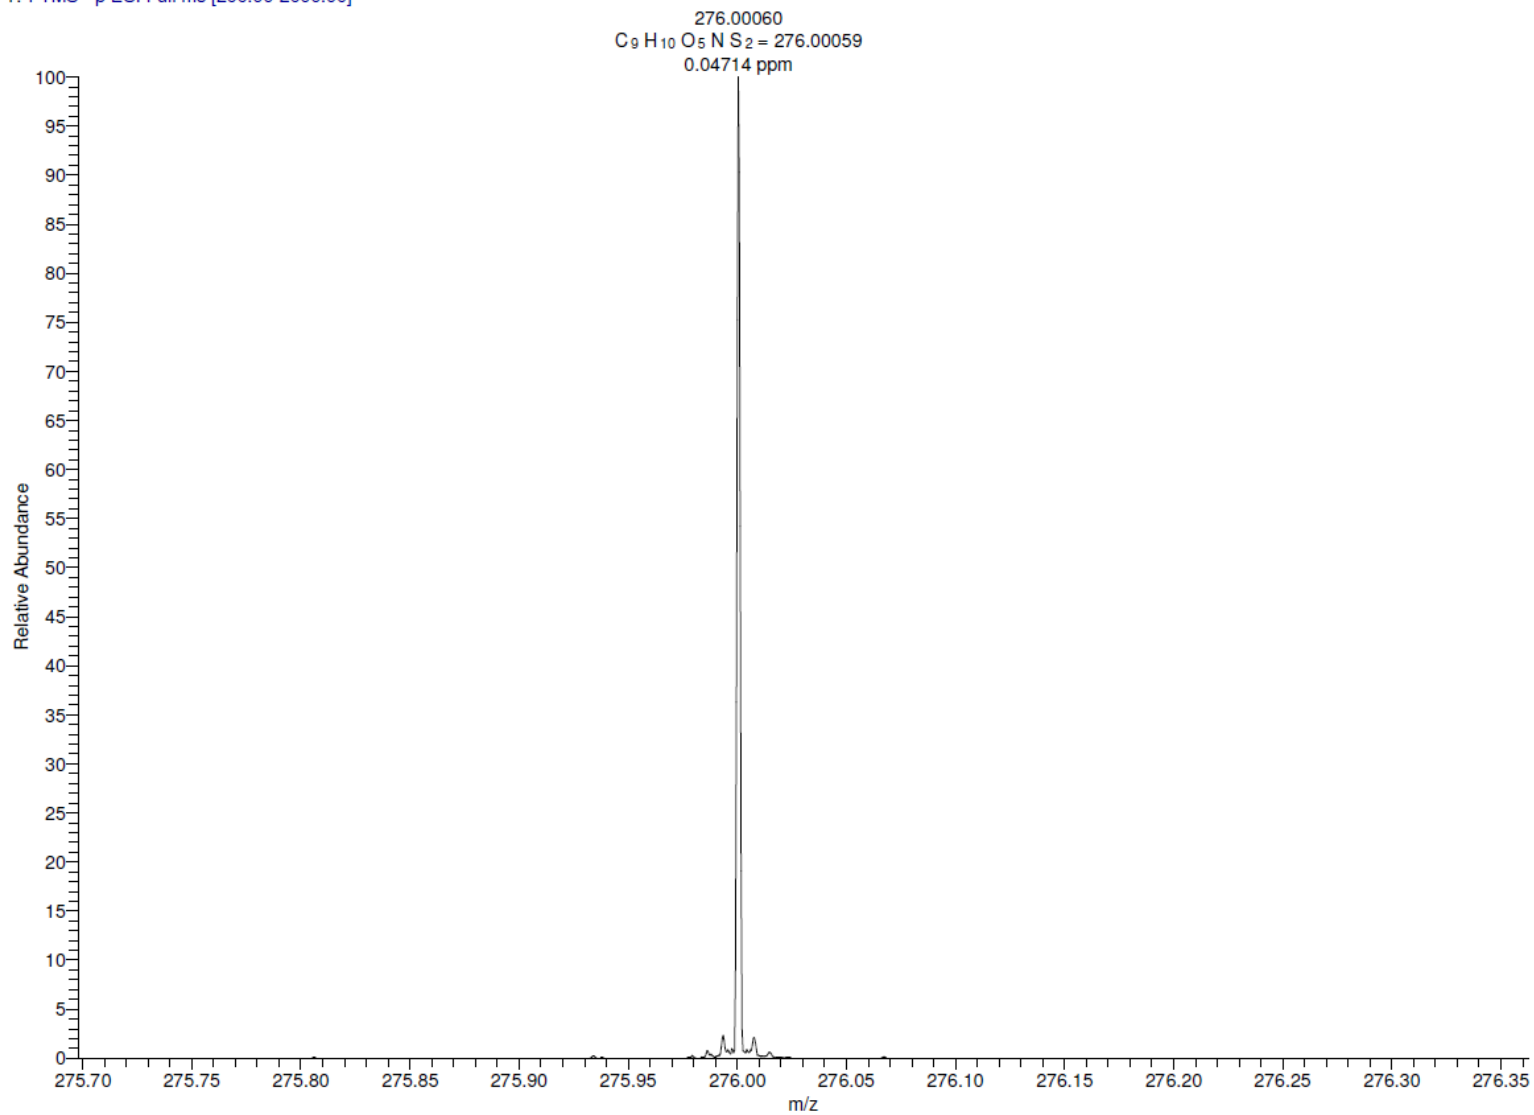

**Fig. S31.** HR MS spectrum (ESI) of sodium *S*-(3-carboxy-4-nitrophenyl) sulfathioate (**2g**).

230311servis\_04-

3/23/2011 6:56:41 PM

Jansa, LC68-2

230311servis\_04- #61-64 RT: 1.77-1.86 AV: 4 NL: 5.53E6  
T: FTMS - p ESI Full ms [50.00-600.00]

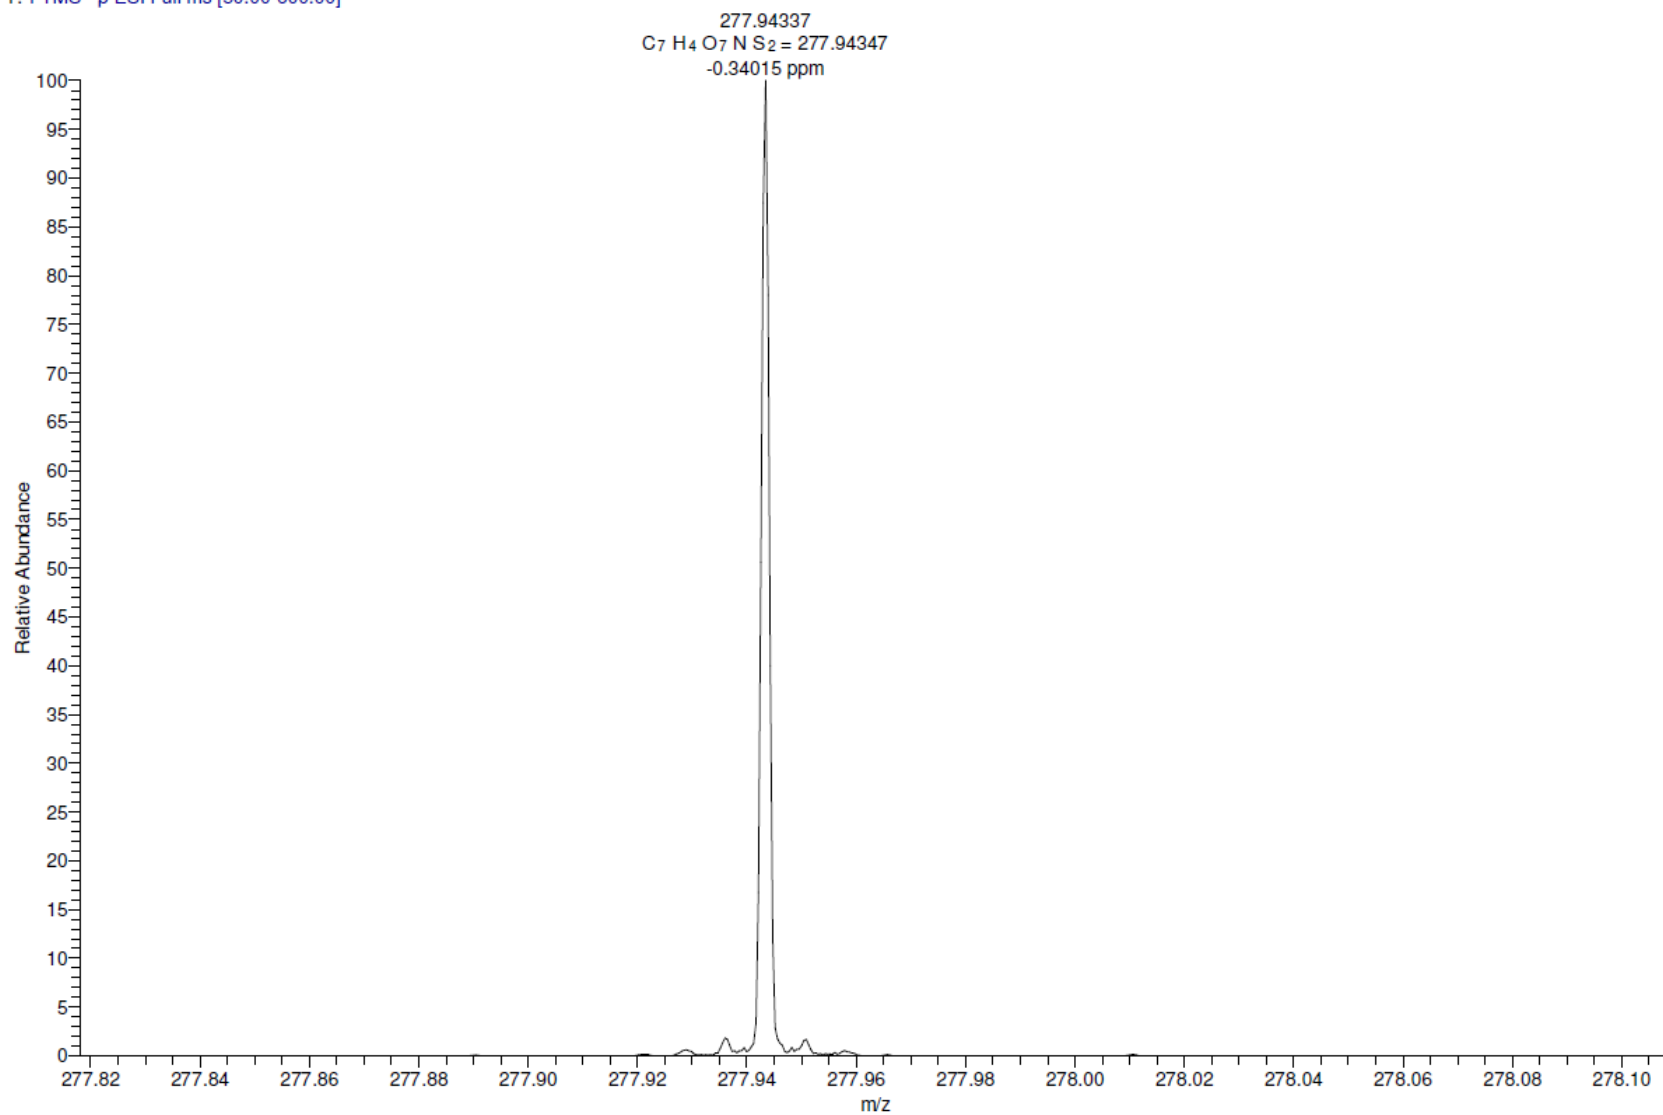

**Fig. S32.** HR MS spectrum (ESI) of sodium *S*-(2-aminobenzo[*d*]thiazol-6-yl) sulfthioate (**2h**).

\\147.231.123.46\data\...271010servis\_4

10/27/2010 9:29:04 AM

Jansa, LC 67-D

271010servis\_4 #44-49 RT: 1.24-1.38 AV: 6 NL: 3.42E6

T: FTMS + p ESI Full ms [200.00-2000.00]

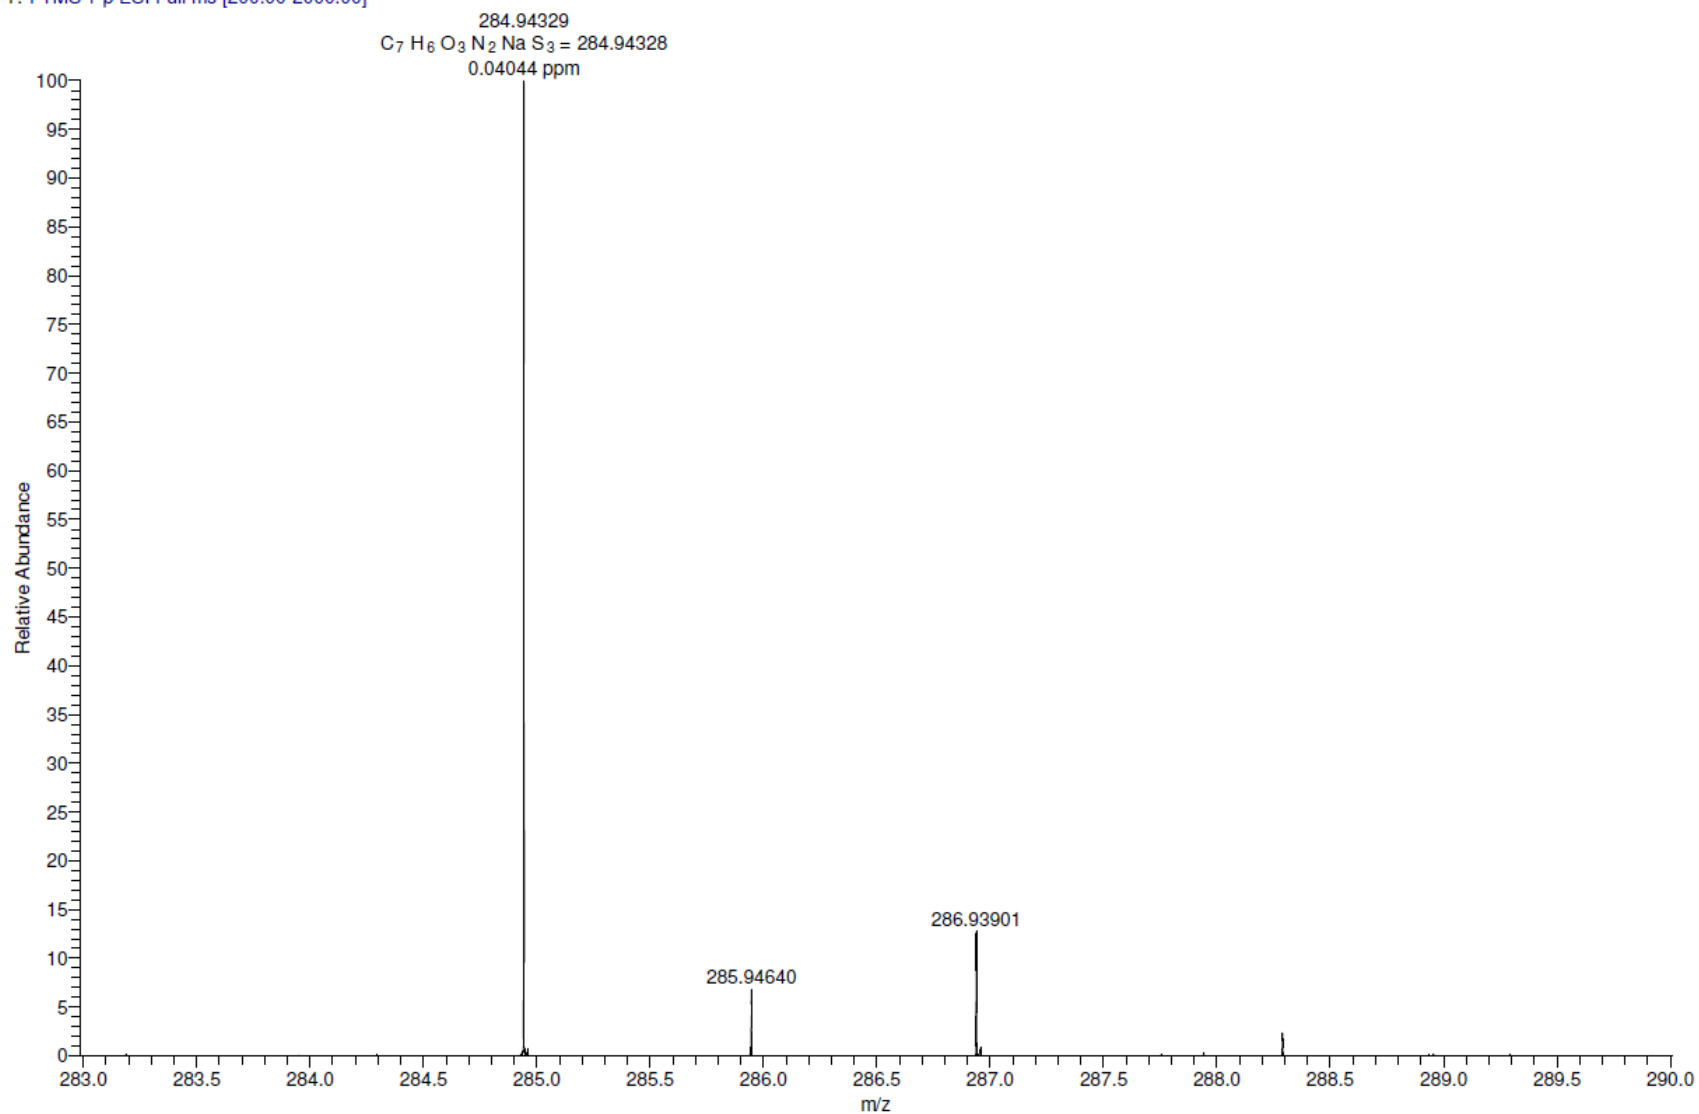

**Fig. S33.** HR MS spectrum (ESI) of sodium *S*-(2,4-diamino-6-chloropyrimidin-5-yl) sulfathioate (**2i**).

010411servis\_10-

4/1/2011 1:34:47 PM

Jansa, LC 86

010411servis\_10- #60-63 RT: 1.74-1.83 AV: 4 NL: 1.16E7  
T: FTMS - p ESI Full ms [50.00-600.00]

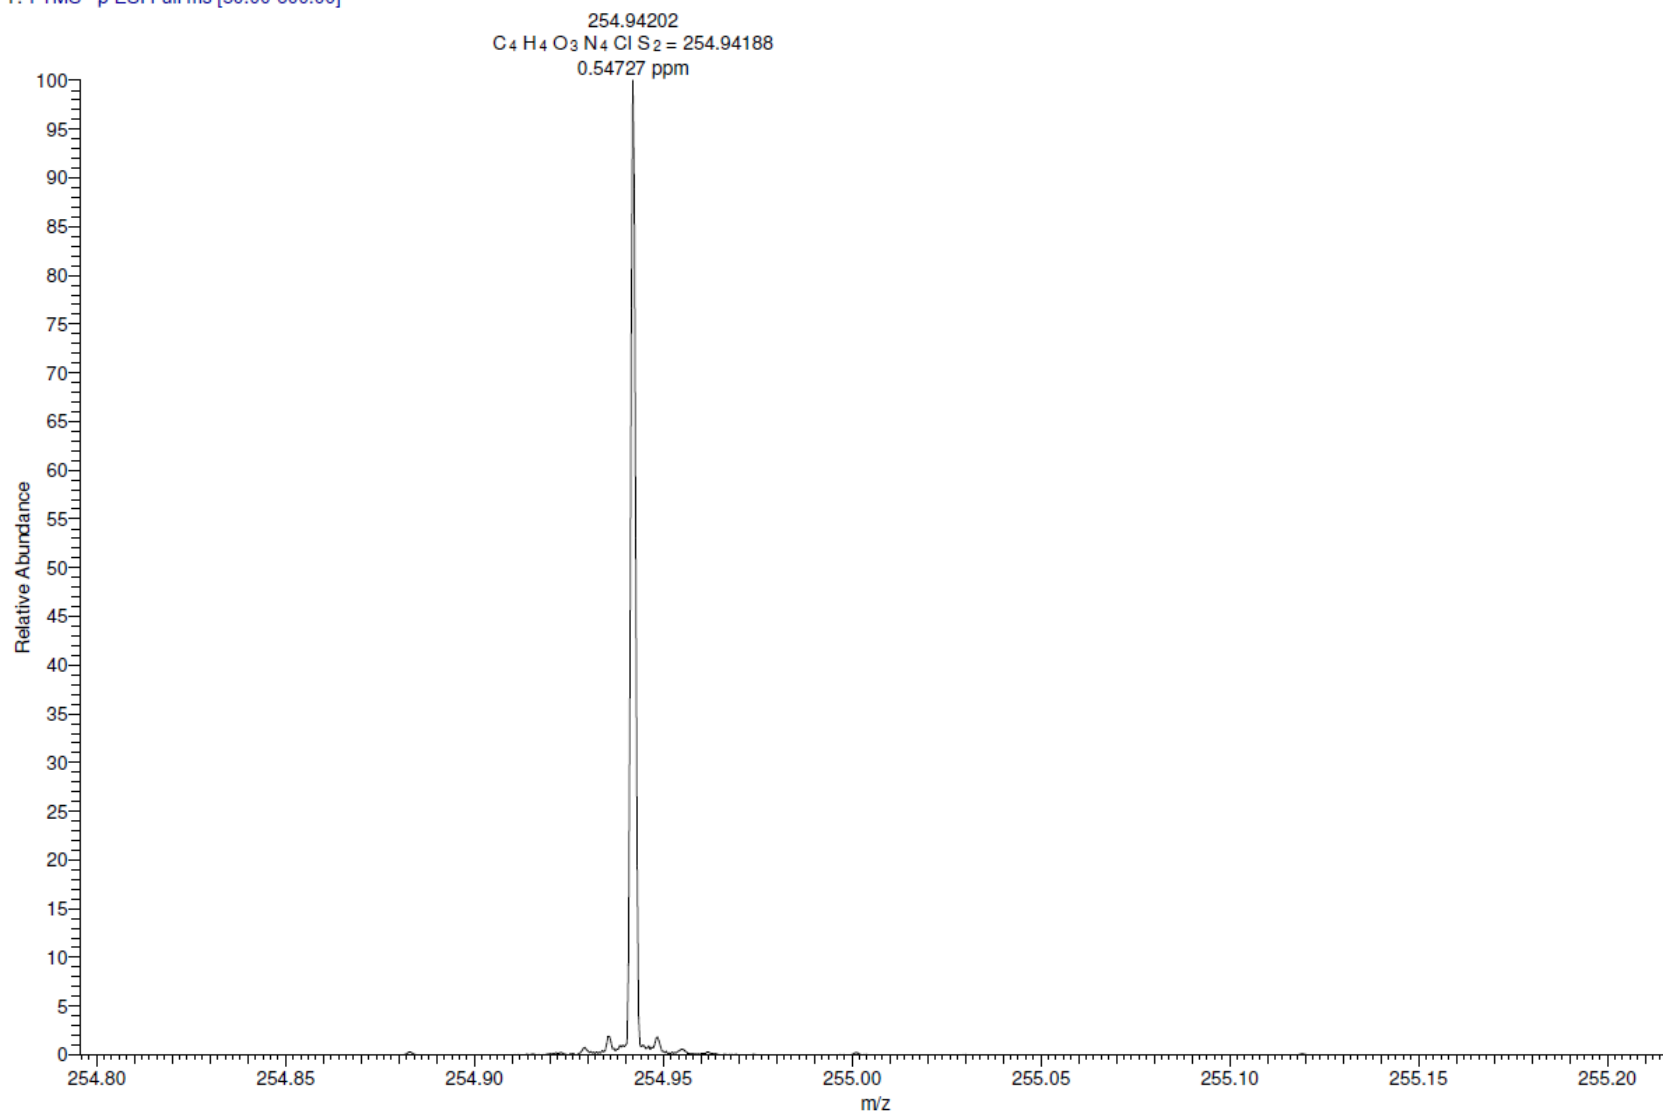

**Fig. S34.** HR MS spectrum (ESI) of sodium *S*-(2-amino-4,6-dimethoxypyrimidin-5-yl) sulfthioate (**2j**).

l:\servis HR\duben\_2011\140411servis\_02-

4/14/2011 7:00:15 PM

Jansa, LC 92

140411servis\_02- #64-70 RT: 1.73-1.89 AV: 7 NL: 3.69E7

T: FTMS - p ESI Full ms [200.00-2000.00]

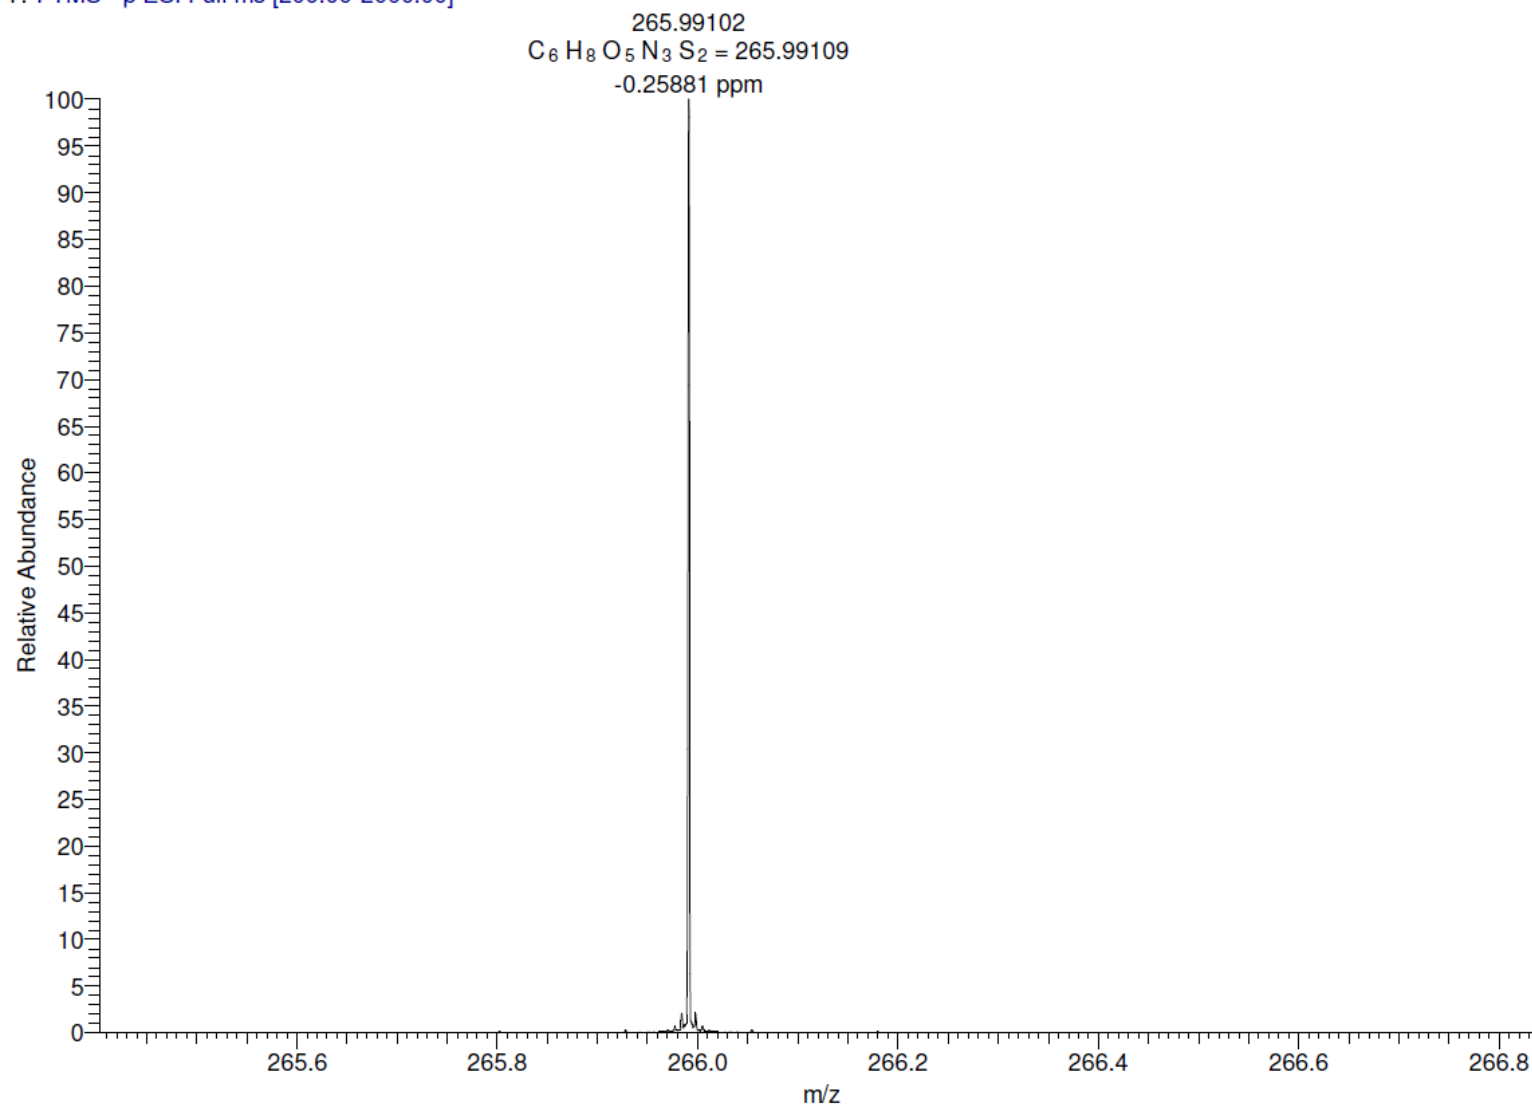

**Fig. S35.** HR MS spectrum (ESI) of sodium *S*-(2,4-diamino-6-hydroxypyrimidin-5-yl) sulfathioate (**2k**).

060511servis\_3-

5/6/2011 10:07:49 AM

Jansa, LC 91

060511servis 3- #62-63 RT: 1.71-1.74 AV: 2 NL: 2.95E6  
T: FTMS - p ESI Full ms [50.00-600.00]

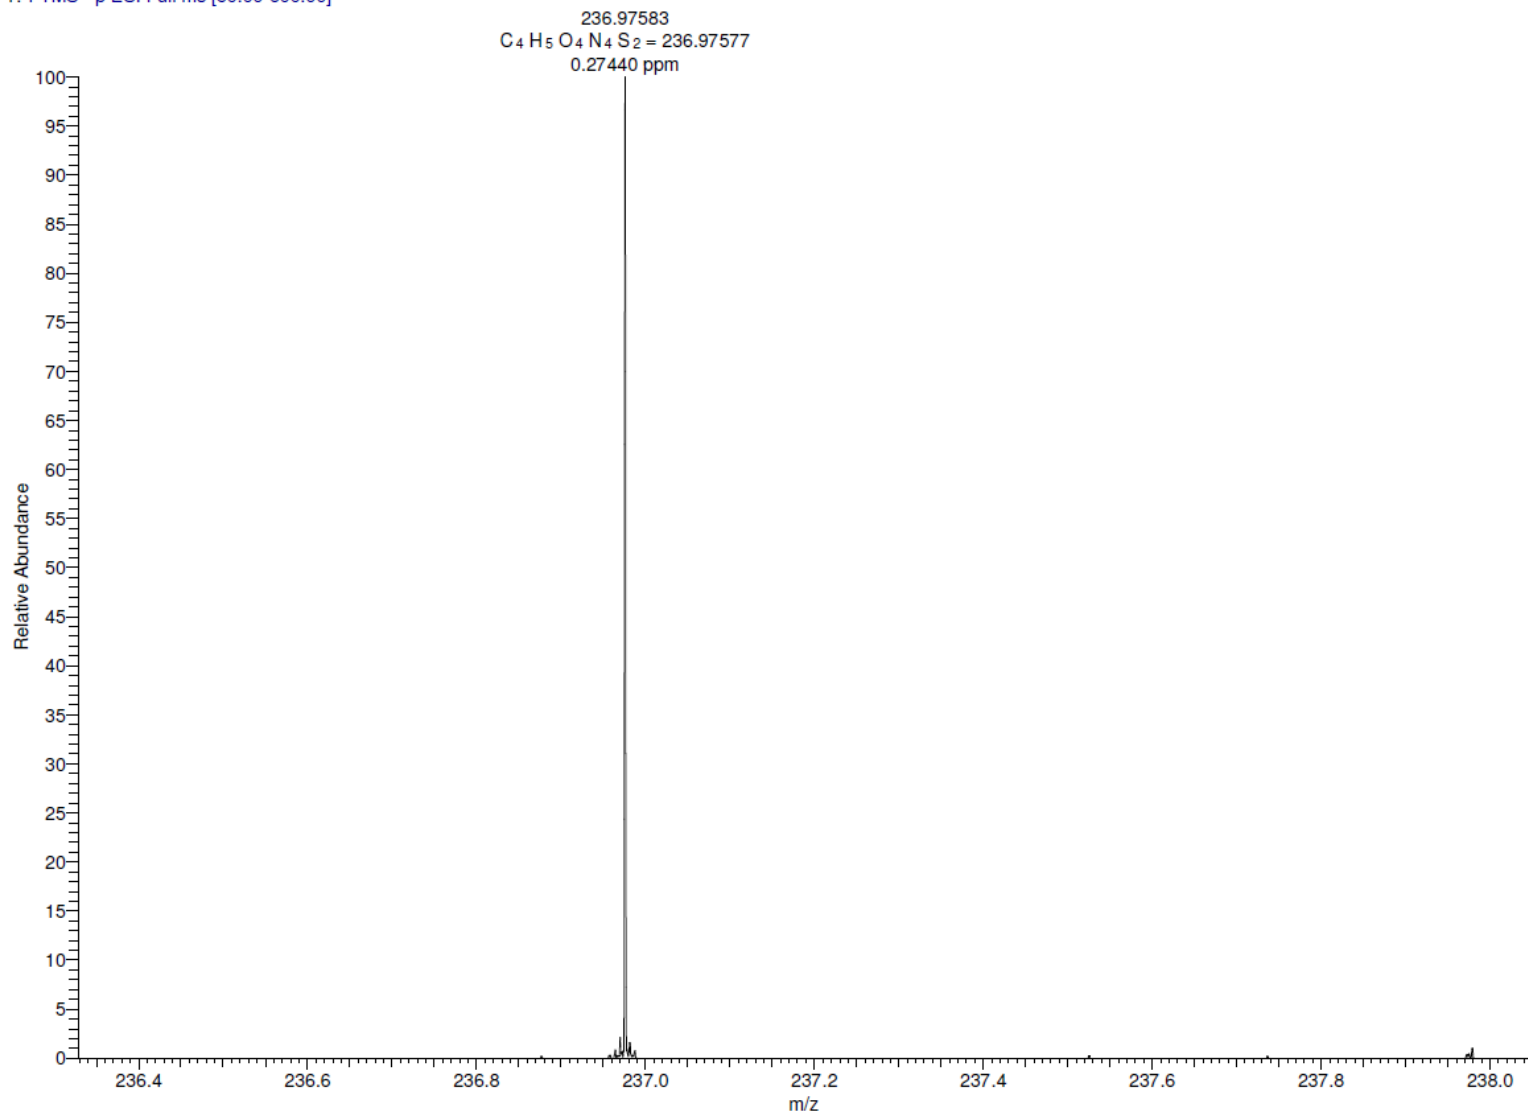



**Fig. S36.**  $^1\text{H}$  and  $^{13}\text{C}$  NMR spectra (DMSO- $d_6$ ) of sodium *S*-(4,6-dimethylpyrimidin-2-yl) sulfathioate (**21**).

060511servis\_4-

5/6/2011 10:11:53 AM

Jansa, LC 100

060511servis 4- #66-68 RT: 1.83-1.88 AV: 3 NL: 3.40E5  
T: FTMS - p ESI Full ms [50.00-600.00]

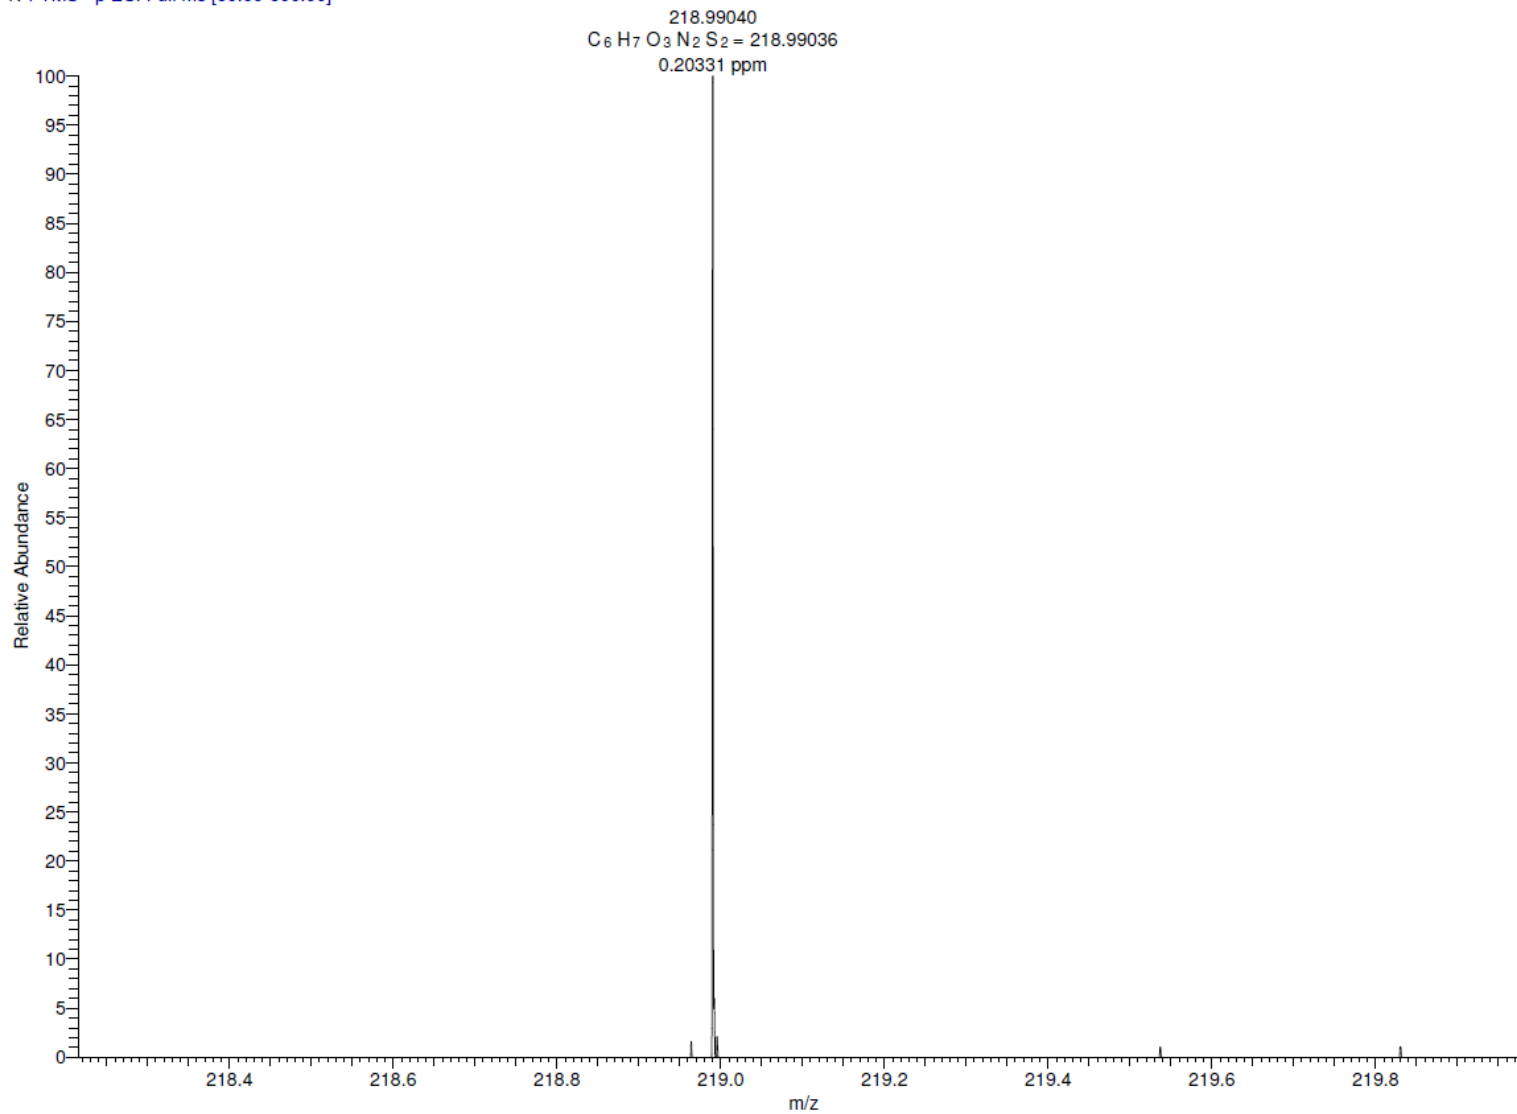

Fig. S37. UPLCs of conversion of **1c** to **2c**

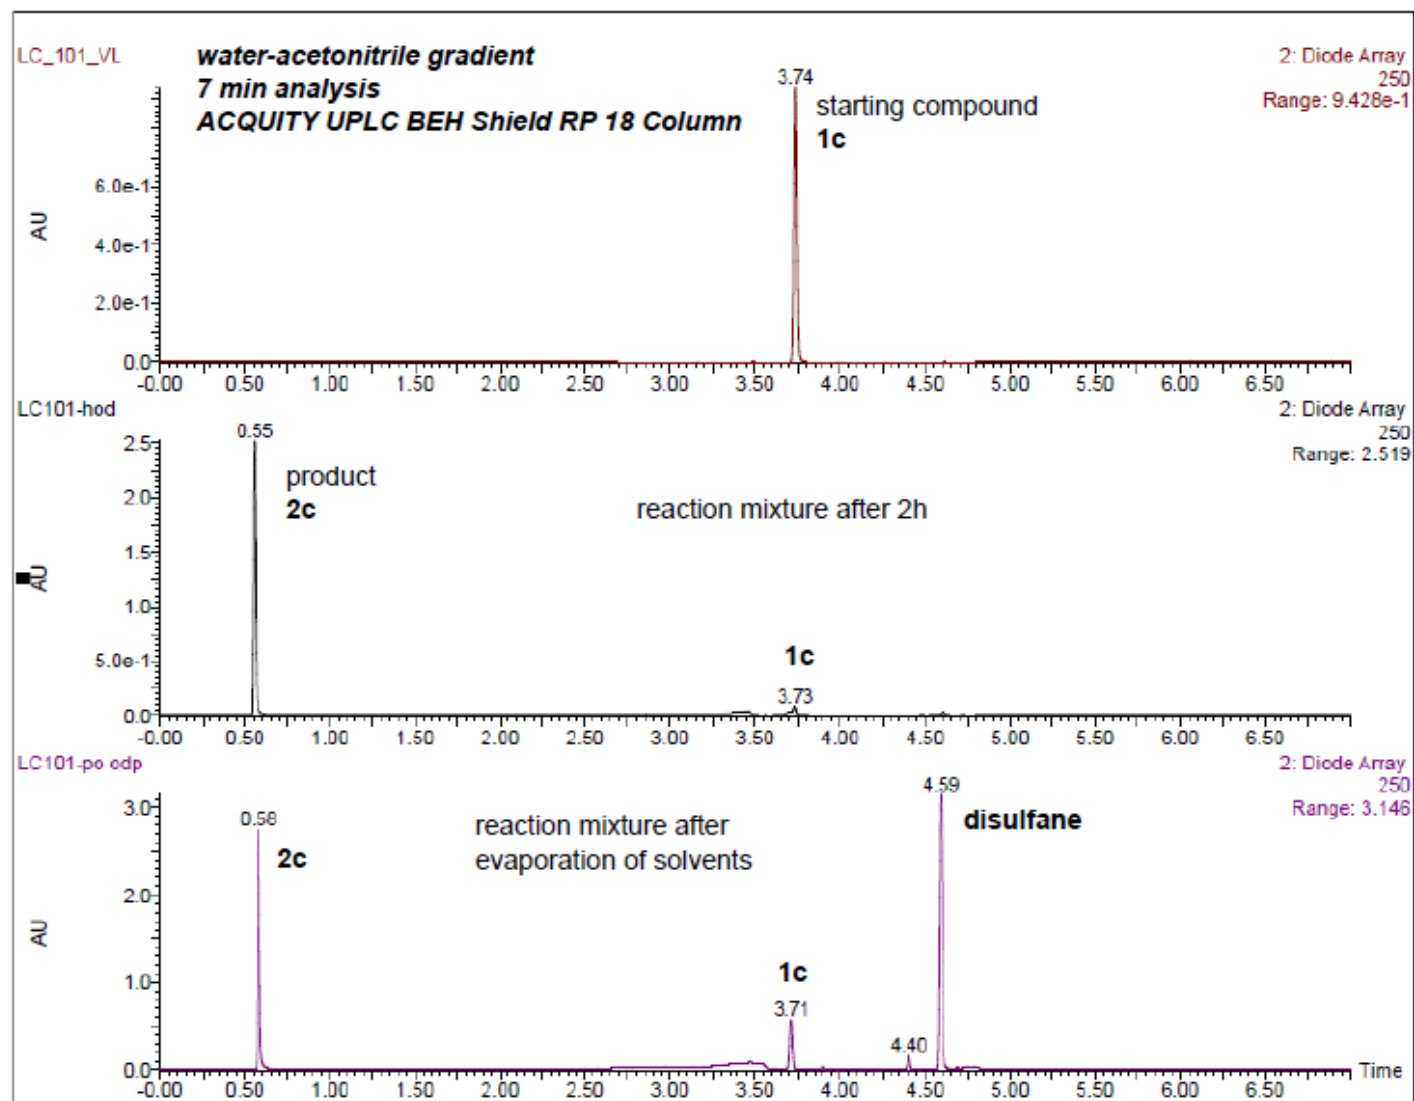

Fig. S38. UPLCs of conversion of **1h** to **2h**

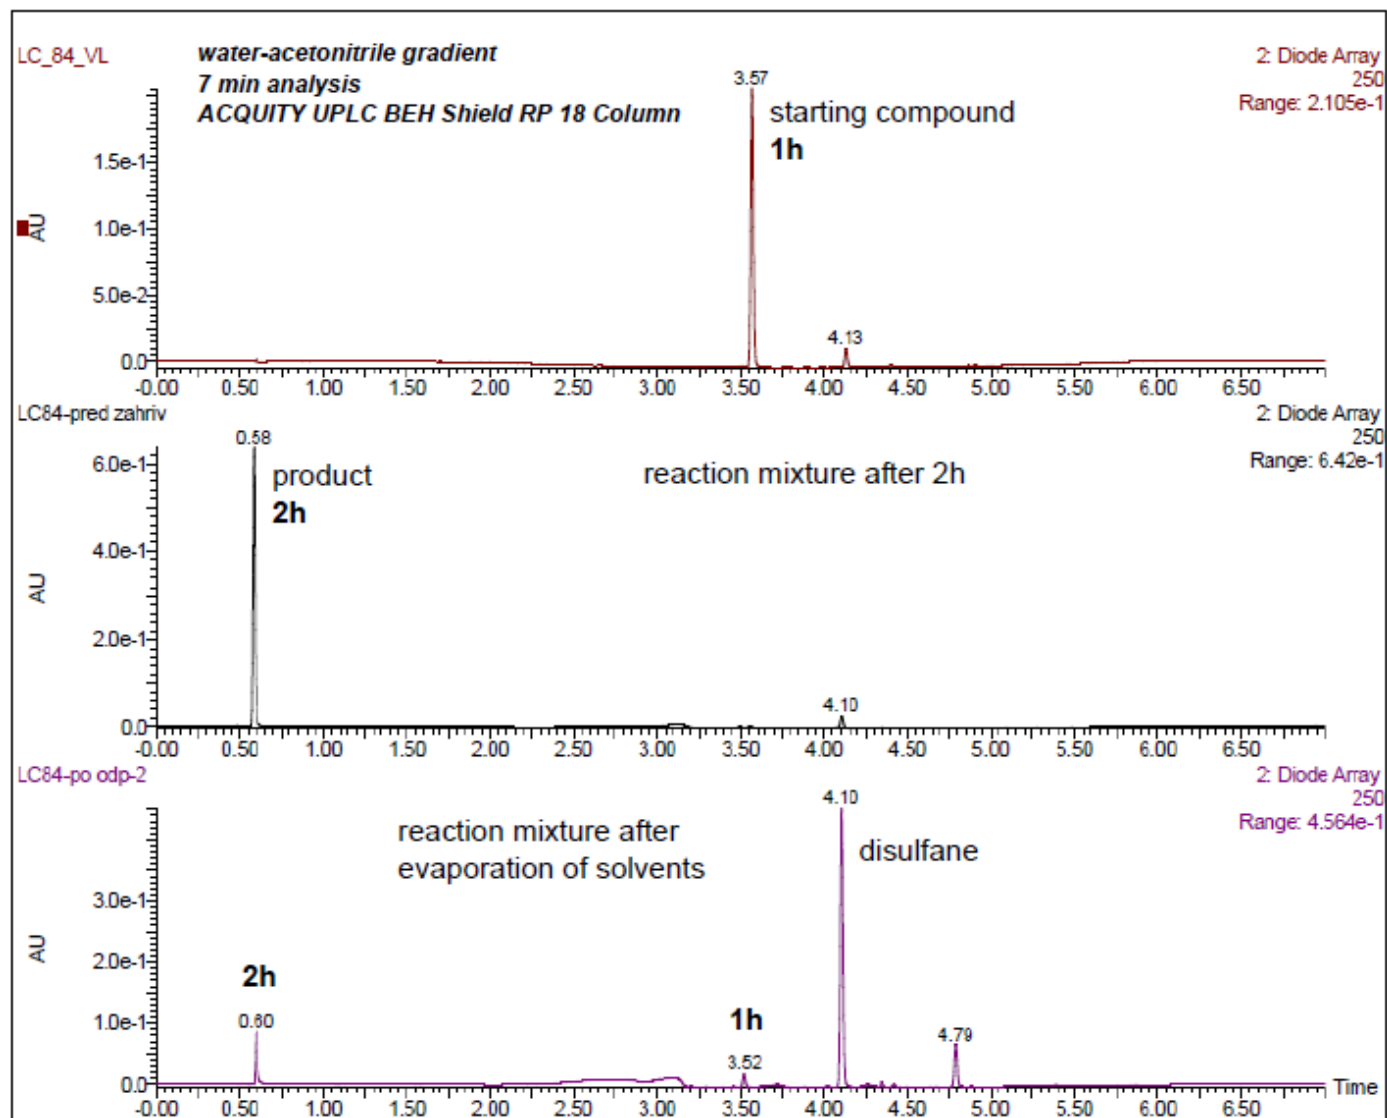

Supplement: c2ra21975a.pdf [file c2ra21975a.pdf]
